# Supplementary material for: The 3′ Splice Site of Influenza A Segment 7 mRNA Can Exist in Two Conformations: A Pseudoknot and a Hairpin
Source: PLoS One. 2012 Jun 7;7(6):e38323. doi: 10.1371/journal.pone.0038323 (PMC3369869; doi:10.1371/journal.pone.0038323)
Supplement: Table S3 — Table with GenBank accession numbers and sequences used in this study. Unique sequences are ranked according to their ability to form stable secondary structure. The most stable are at the top, while the least stable are at the bottom. Relative stability is estimated as the fraction of GC pairs multiplied by the fraction of nucleotides in canonical pairs (color annotated red to green for both PK and HP). Also shown are the number of sequences that collapse into each unique sequence, the host specificity and the viral strain. (XLSX) [file pone.0038323.s006.xlsx]

## Sheet: Sheet1
GenBank #	Sequence	PK (bp x GC pairs)	HP (bp x GC pairs)	Sequences	Host	Strain
;GQ923310;GQ240816;EF597299	GGCCUGAAAGAUGAUCUUCUUGAAAAUUUGCAGGCCUACCAGAAACGGAUGGGAGUGCAAAUG	0.5	0.5	3	Avian	H5N2;H7N7; H8N4
;DQ492912;EF124170;DQ492943	GGUCUGAGAGAUAAUCUUCUCGAAAAUUUGCAGGCCUACCAGAAACGAAUGGGAGUGCAGAUG	0.5	0.5	3	Avian	H5N1
;AF073203	GGCCUAAAAGAUGAUCUUCUUGGAAAUUUGCAGGCCUACCAGAAACGGAUGGGAGCGCAAAUG	0.5	0.472222	1	Avian	H5N2
;EU743099;EU743028;EU743087	GGCCUAAAAGAUGAUCUUCUUGGAAAUUUGCAGGCCUACCAGAAACGGAUGGGAGUGCAAAUG	0.5	0.5	3	Avian	H5N2
;DQ376678	GGUCUGAGAGAUGAUCUUCUCGAAAAUUUGCAGGCCUACCAGAAACGGAUGGGAGUGCAAAUG	0.5	0.5	1	Avian	H6N1
;CY021470;CY081301;CY014592	GGCCUAAAAGAUGAUCUUCUUGAAAAUUUGCAGGCCUACCAGAAACGGAUGGGAGUGCAGAUG	0.5	0.5	3	Avian	Mixed
;HM144887	GGCCUGAAAGAUGAUCUUCUUGAAAACUUGCAGGCCUACCAGAAACGGAUGGGAGUGCAAAUG	0.5	0.472222	1	Avian	H6N6
;CY005086;CY021214;EU871837	GGCCUAAAAGAUGAUCUUCUUGAAAAUUUGCAGGCCUACCAGAAACGGAUGGGAGUGCAAAUG	0.5	0.5	3	Avian	Mixed
;CY014938	GGUCUAAAAGAUGAUCUUCUUGAAAAYUUGCAGGCCUACCAGAAACGGAUGGGAGUGCAAAUG	0.470588	0.470588	1	Avian	H4N3
;HM114548	GGUCUAAGAGAUAAUCUUCUUGAAAAUCUGCAGGCCUACCAGAAACGAAUGGGAGUGCAGAUG	0.5	0.5	1	Human	H5N1
;AB434299	GGCCUGAAAGAUGAUCUUCUUGAAAAUUUGCAGGCCUACCAGAAACGGAUGGGAGUGCAAAUA	0.5	0.5	1	Swine	H1N1
;AY609315;CY016884;CY017060;CY017052;EF124795;DQ365002;DQ365009;DQ363925;DQ394576;CY063863;DQ359692;DQ434888;DQ363928;DQ399542;DQ400912;EU697235	GGUCUGAGAGAUAAUCUUCUUGAAAAUUUGCAGGCCUACCAGAAACGAAUGGGAGUGCAGAUA	0.444444	0.444444	16	Avian	H5N1
;CY015152;CY015156;CY015161	GGUCUAAAAGAUGACCUUCUUGAAAAUUUGCAGGCCUACCAGAAACGAAUGGGAGUGCAAAUG	0.444444	0.444444	3	Avian	H5N3; H16N3
;DQ914817	GGUCUGAGAGACGAUCUUCUUGAAAAUUUGCAGGCCUACCAGAAACGAAUGGGAGUGCAGAUG	0.444444	0.444444	1	Avian	H5N1
;CY079717;CY060264;U49118;EU580555;CY076993;HQ285889;HM144868;HM144886;HM144814;HM144812;HM144845;HM144830;HM144829;HM144825;HM144858;HM144827;HM144824;HM144848;HM144811;HM144866;HM144865;HM144867;HM144864;HM144861;HM144863;HM144862;HM144859;HM144857;HM144856;HM144860;DQ376685	GGUCUGAAAGAUGAUCUUCUUGAAAACUUGCAGGCCUACCAGAAACGGAUGGGAGUGCAAAUG	0.444444	0.419753	31	Avian	Mixed
;FJ686787;FJ686779;FJ686771;FJ686763;FJ686755;FJ686747;GQ257496;GU053522;GQ923390	GGUCUAAAAGAUGAUCUUCUUGAAAAUUUGCAGGCCUACCAGAAACGGAUGGGGGUGCAGAUG	0.444444	0.444444	9	Avian	Mixed
;AF073194;AY241613;AY241609;AY241612;AF073195;EU743065	GGUCUAAAAGAUGAUCUUCUUGAAAAUUUGCAGGCCUACCAGAGACGGAUGGGAGUGCAAAUG	0.444444	0.444444	6	Avian	Mixed
;CY004227;CY004235;CY004243	GGUCUGAAAGAUAAUCUUCUUGAAACUUUGCAGGCCUACCAGAAGCGGAUGGGAGUGCAAAUG	0.444444	0.419753	3	Avian	H6N3
;CY079477	GGUCUGAAAGAUGAUCUUCUUGUAAAUUUGCAGGCCUACCAAAAACGGAUGGGAGUGCAAAUG	0.444444	0.444444	1	Avian	H2N3
;CY014985;GU052815;GU052823;AY653194;DQ997290	GGUCUGAGAGAUGAUCUUCUUGAAAAUUUGCAGGCCUACCAGAAACGGAUGGGAGUGCAGAUG	0.444444	0.444444	5	Avian	Mixed
;AF523497	GGUCUGAAAGAUGAUCUUCUUGAAAAUUUGCAGGCCUACCAAAAAAGGAUGGGAGUGCAAAUG	0.444444	0.444444	1	Avian	Mixed
;HM144894;HM144893	GGUCUGAAAGACGAUCUCCUUGAAAAUUUGCAGGCCUACCAGAAACGGAUGGGAGUGCAAAUG	0.444444	0.419753	2	Avian	H6N8
;HM172135;FJ538950	GGUCUGAGGGACAAUCUUCUUGAAAAUUUGCAGGCCUACCAGAAACGAAUGGGAGUGCAGAUG	0.444444	0.444444	2	Avian	H5N1
;CY005414	GGUCUAAAGGAUGAUCUUCUUGAAAAUUUGCAGGCCUACCAGAAACGAAUGGGAGUGCAAAUG	0.444444	0.444444	1	Avian	H2N1
;CY033343;CY033375;CY045352;CY076006;CY076390;CY076398;CY076414;CY053790;CY076873;CY076809;CY079317	GGUCUGAAAGAUGAUCUUCUUGAAAAUUUGCAGGCCUACCAGAAGCGGAUGGGAAUGCAGAUG	0.444444	0.444444	11	Avian	Mixed
;AF509065	GGUCUGAGAGAUAAUCUUCUUGAAAAUUUGCAGGCCUACCAGAAAAGAAUGGGAGUGCAGAUG	0.444444	0.444444	1	Avian	H5N1
;CY004440	GGUCUAAAAGAUGAUCUUCUUGAAAAUUUGCAGACCUACCAGAAACGAAUGGGAGUGCAAAUG	0.444444	0.444444	1	Avian	H11N1
;AB546156;AB546170	GGUCUGAAAGAUGAUCUUCUUGGAAAUUUGCAGGCCUACCAGAAACGGAUGGGAGUGCAAAUG	0.444444	0.444444	2	Avian	Mixed
;AY241611	GGUCAAAAAGAUGAUCUUCUUGAAAAUUUGCAGGCCUACCAGAGACGGAUGGGAGUGCAAAUG	0.444444	0.444444	1	Avian	H7N2
;CY076825	GGUCUAAAAGACGAUCUUCUUGAAAAUUUGCAGACCUACCAGAAGCGGAUGGGAGUGCAGAUG	0.444444	0.444444	1	Avian	H7N2
;CY079132	GGUCUAAAAGAUGACCUUCUUGAAAAUUUGCAGGCCUACCAGAAGCGGAUGGGAGUGCAAAUG	0.444444	0.444444	1	Avian	H3N8
;FJ610082	GGUCUUAAAGAUGAUCUUCUUGAAAAUUUGCAGGCCUACCAGAAACGGAUGGGAGUGCAAAUG	0.444444	0.444444	1	Avian	Mixed
;GU052923	GGUCUGAAAGAUGAUCUUCUUGAAAAUUUGCAGGCCUACCAGAAACGAAAGGGAGUGCAAAUG	0.444444	0.419753	1	Avian	H7N1
;CY076166	GGUCUGAAAGAUGAUCUUCUUGAAAAUUUGCAGACCUACCAGAAACGGAUGGGAGUGCAGAUG	0.444444	0.444444	1	Avian	H3N8
;AF359560	GGUCUGAAAGAUAAUCUUCUUGAAAAUUUGCAGGCCCACCAGAAACGAAUGGGAGUGCAAAUG	0.444444	0.444444	1	Avian	H5N1
;EU651887	GGUCUGAGAGAUAAUCUCCUUGAAAAUUUGCAGGCCUACCAGAAACGAAUGGGAGUGCAGAUG	0.444444	0.419753	1	Avian	H5N1
;HM172163	GGUCUGAGAGACAAUCUUCUUGAAAAUUUGCAGGCCUACCAGAAACGAAUGGGAGUGCAGCUG	0.444444	0.419753	1	Avian	H5N1
;EU662948	GGUCUGAAAGAUGAUCUUCUUGAAAAUUUGCAGGCCUACCAGAAAAGGAUGGGAGUGCAAAUA	0.444444	0.444444	1	Avian	H9N2
;GU053339;GU053346	GGUCUAAAAGAUGAUCUUCUUGGAAAUUUGCAGGCCUACCAGAAACGGAUGGGAGUGCAGAUG	0.444444	0.444444	2	Avian	H10N7
;CY020782;CY020822;CY020838;CY020854;GU053251;GU053257;CY081251;CY020830	GGUCUGAAAGAUGACCUUCUUGAAAAUUUGCAGGCCUACCAGAAGCGGAUGGGAGUGCAAAUG	0.444444	0.444444	8	Avian	H6N2
;AF231360;AF457712;AF474054;AF474053;AF474056;AF474057;AF474058;CY020790;GU053235;EU735811;CY041283	GGUCUAAAAGAUGAUCUCCUUGAAAAUUUGCAGGCCUACCAGAAACGGAUGGGAGUGCAAAUG	0.444444	0.419753	11	Avian	Mixed
;GQ921325	GGUCUAAAAGAUGAUCUUCUUGAAAAUUUGCAGGCCUACCAGAAACGGAUGGUAGUGCAAAUG	0.444444	0.444444	1	Avian	H7N3
;HM060050	GGUCUAAAAGAUGACCUUCUUGAAAAUUUGCAGGCCUACCAGAAACGGAUGGGAGUGCAAAUG	0.444444	0.444444	1	Avian	Mixed
;AF073196	GGUCUAAAAGAUGAUCUUCUUGAAAAUUUGCAGGCCUACCAGAAACGACUGGGAGUGCAAAUG	0.444444	0.444444	1	Avian	H7N2
;DQ835776;DQ997098;DQ997391;DQ320970;DQ482659;DQ482660;EF541454;DQ482664;FJ784879;FJ784880;FJ784882;FJ784887;EU594352;FJ784888;DQ094263;GU272009	GGUCUGAGAGAUAAUCUUCUUGAAAAUUUGCAGGCCUACCAGAAACGGAUGGGAGUGCAGAUG	0.444444	0.444444	16	Avian	H5N1
;CY005563	GGUCUGAAGGAUGAUCUUCUUGAAAAUUUGCAGGCCUACCAGAAGCGGAUGGGAGUGCAGAUG	0.444444	0.444444	1	Avian	H3N6
;EF124131;GU050398;GU052397;HM172145	GGUCUGAGAGAUAAUCUUCUUGAAAAUUUGCAGGCCUACCAGAAGCGAAUGGGAGUGCAGAUG	0.444444	0.444444	4	Avian	H5N1
;EU195395;GU050358;AY950243;HM172140;DQ997521;GQ122500;GQ122506;GQ122530;HM440092;HM440116;HM440132;HM440140;HM440148	GGUCUGAGAGAUAAUCUUCUUGAAAAUUUGCAGGCCUACCAGAAACGAAUGGGAGUGCAAAUG	0.444444	0.444444	13	Avian	H5N1
;EF124179;EF124181;GU272001	GGUCUGAGGGAUAAUCUUCUUGAAAAUUUGCAGGCCUACCAGAAACGAAUGGGAGUGCAGAUG	0.444444	0.444444	3	Avian	H5N1
;AY300973;AY849792;GU052645	GGACUAAAAGAUGAUCUUCUUGAAAAUUUGCAGGCCUACCAGAAACGGAUGGGAGUGCAAAUG	0.444444	0.419753	3	Avian	Mixed
;CY016868;CY040902;CY040953;DQ492989;CY016820;FJ445227;GU083624	GGUCUGAGAGAUAAUCUUCUUGAAAAUUUGCAGGCCUACCAAAAACGAAUGGGAGUGCAGAUG	0.444444	0.444444	7	Avian	H5N1
;GU050883	GGUCUAAAAGAUGAUCUUCUUGAAAAUUUGCAGGCCUACCAGAACCGGAUGGGAGUGCAGAUG	0.444444	0.444444	1	Avian	H10N7
;DQ021740;GU051076;GU051080	GGUCUGAAGGAUGAUCUUCUUGAAAAUUUGCAGGCCUACCAGAAGCGAAUGGGAGUGCAAAUG	0.444444	0.444444	3	Avian	H11N6
;L25831	GGUCUGAAAGAUGAUCUCCUUGAAAAUUUGCAGGCCUACCAGAAACGGAUGGGAGUGCAAAUA	0.444444	0.419753	1	Avian	H6N5
;CY076262;GU050016;GU186494	GGUCUAAAAGAUGAUCUUCUCGAAAAUUUGCAGGCCUACCAGAAACGGAUGGGAGUGCAAAUG	0.444444	0.419753	3	Avian	Mixed
;CY041355	GGUCUGAAAGAUGAUCUUCUUGAAAAUCUGCAGGCCUACCAGAAACGGAUGGGAGUGCAAAUG	0.444444	0.419753	1	Avian	H4N3
;CY076014	GGUCUGAAAGACGACCUUCUUGAAAAUUUGCAGACCUACCAGAAGCGGAUGGGAGUGCAGAUG	0.444444	0.444444	1	Avian	H3N8
;EU980517;EU980509;FJ357137;FJ357121;FJ357113;GU053216;FJ357129;GQ257449;GU051347	GGUCUAAAAGAUGACCUUCUUGAAAAUUUGCAGGCCUACCAGAAACGGAUGGGAGUGCAGAUG	0.444444	0.444444	9	Avian	Mixed
;EU871829;CY053822	GGUCUGAAAGACGAUCUUCUUGAAAAUUUGCAGACCUACCAGAAGCGGAUGGGAGUGCAGAUG	0.444444	0.444444	2	Avian	Mixed
;CY037008;GU050259;CY076310;CY076062;CY077183;CY025094;CY047545;CY081349;CY045280;CY029922;CY078203;GU050152;CY032699;CY039639;CY039647;CY039655;CY039663;CY039671;CY039679;CY039726;CY039734;CY081413;CY081421;CY047609;GQ923230;CY018910;CY020862;CY024819;GU051933;CY021478;CY024795;CY081405;CY021862;CY081381;CY045304;GU051841;GU051848;GU050099	GGUCUAAAGGAUGAUCUUCUUGAAAAUUUGCAGGCCUACCAGAAACGGAUGGGAGUGCAGAUG	0.444444	0.444444	38	Avian	Mixed
;GU050168;GQ176143;CY005823;CY077642;U49119;CY005747;CY005752;CY005756;CY005759;CY021398;AB473941;HQ259227;HQ259235;CY043841;GQ414940;GU220602	GGUCUGAAAGAUGAUCUCCUUGAAAAUUUGCAGGCCUACCAGAAACGGAUGGGAGUGCAAAUG	0.444444	0.419753	16	Avian	Mixed
;CY028252	GGCCUGAAAGAUGAUCUUCUUGAAAAUUUACAGGCCUACCAGAAACGGAUGGGAGUGCAGAUG	0.444444	0.419753	1	Avian	H4N8
;CY021414;CY024875;CY024883;CY024891;CY025150;CY025158;CY025174;CY025182;GU053016	GGUCUGAAAGAUGAUCUUCUUGAAAAUUUGCAGGCCUACCAGAAACGGAUGGGUGUGCAAAUG	0.444444	0.444444	9	Avian	H7N1
;AB436553;AB436737;AB458242;AB458250;EU676173;FJ654298	GGUCUGAGAGAUAAUCUUCUUGAAAAUUUGCAGGCCUACCAGACACGAAUGGGAGUGCAGAUG	0.444444	0.444444	6	Avian	H7N1
;DQ464356;DQ643985;AM744957;AM913989;GQ404562;AB498025	GGUCUGAGAGAUAACCUUCUUGAAAAUUUGCAGGCCUACCAGAAACGAAUGGGAGUGCAGAUG	0.444444	0.444444	6	Avian	H5N1
;HM144844	GGUCUGAAAGAUGAUCUGCUUGAAAAUUUGCAGGCCUACCAGAAACGGAUGGGAGUGCAAAUG	0.444444	0.419753	1	Avian	H6N2
;HM172121;HM172132	GGACUGAGAGAUAAUCUUCUUGAAAAUUUGCAGGCCUACCAGAAACGAAUGGGAGUGCAGAUG	0.444444	0.419753	2	Avian	H5N1
;GU052884;GU052892;GU052900	GGUCUGAAAGAUGAUCUUCUUGAAAAUUUGCAGGCCUACCAGAGACGGAUGGGAGUGCAAAUG	0.444444	0.444444	3	Avian	Mixed
;CY078436;CY078572;CY078668	GGUCUAAAGGAUGAUCUUCUUGAAAAUUUGCAGGCCUACCAGAAGCGGAUGGGAGUGCAAAUG	0.444444	0.444444	3	Avian	H3N8
;GU051329;GU051408;DQ021741;GU050569;GU050786;GU050625;GU051535;GU051551;GU050583;GU050772;GU051353;GU051549;GU051544;GU051547;GU051557;GU050814;GU050821;GU050576;FJ517275;GU050737;CY004421;CY005178;CY024747;M63536	GGUCUAAAAGAUGAUCUUCUUGAAAAUUUGCAGGCCUACCAAAAACGGAUGGGAGUGCAAAUG	0.444444	0.444444	24	Avian	Mixed
;CY004143;CY004491;GU051896;CY033447;CY014822;CY004467;CY004588;CY005188;DQ021757;GU051141;AY664438;DQ021701;GU051439;CY015501;DQ021728;GU051206;GU051296;CY005324;CY003993;CY004367;CY047553;CY045440;CY004831;CY004000;CY004007;CY004019;CY004040;CY004044;CY004062;CY004026;CY004067;AY619967;AY619976;EU743473;DQ021765;DQ021766;CY017726;CY012825;CY016956;DQ021767;CY017718;DQ021727;CY004267;GU051519;CY…	GGUCUAAAAGAUGAUCUUCUUGAAAAUUUGCAGGCCUACCAGAAACGGAUGGGAGUGCAGAUG	0.444444	0.444444	338	Avian	Mixed
;CY004756;CY004777;EU743315;CY018902;GU053285;GU053292;CY025102	GGUCUAAAGGAUGAUCUUCUUGAAAAUUUGCAGGCCUACCAGAAACGGAUGGGAGUGCAAAUG	0.444444	0.444444	7	Avian	Mixed
;EF124056;EF124175;FM163443;FM163451;EF605598	GGUCUGAGAGAUAAUCUUCUUGAAAACUUGCAGGCCUACCAGAAACGAAUGGGAGUGCAGAUG	0.444444	0.419753	5	Avian	H5N1
;Z26859	GGUCUGAAAGAUGAUCUUCUUGAAAAUUUGCAGGCCUACCAGAAACGGAUGGGGGUGCAGAUA	0.444444	0.444444	1	Avian	H1N1
;CY046127;FJ432763;CY077025;CY041419;AB569562;CY077678;CY077694	GGUCUGAAAGAUGACCUUCUUGAAAAUUUGCAGGCCUACCAGAAACGGAUGGGAGUGCAAAUG	0.444444	0.444444	7	Avian	Mixed
;CY079493	GGUCUAAAGGAUGAUCUUCUUGAAAAUUUGCAGGCCUACCAGAAACGGAUGGGAGUGCAGAUU	0.444444	0.444444	1	Avian	H2N3
;CY021238;CY021326;CY063744;CY063866;CY063874;CY063882;CY063890;CY063898;CY063906;CY063914;CY063922;CY063938;CY063954;CY063970;CY063994;CY064034;CY064050;CY064058;CY064090;CY064106;CY064162;CY076614;CY078314;CY063946;CY063978;CY063962;CY064026;CY079325;CY076694;CY077987;CY078091;CY078155;CY078171;CY064242;CY078187;CY078330;CY067673;CY067681;CY078195;CY077971;CY077995;CY078011;CY078282;CY022750;CY…	GGUCUAAAAGAUGAUCUUCUUGAAAAUUUGCAGGCCUACCAGAAGCGGAUGGGAGUGCAGAUG	0.444444	0.444444	53	Avian	Mixed
;CY045320	GGUCUAAAAGAUGAUCUUCUUGAAAAUUUGCAGACCUACCAGAAACGGAUGGGAGUGCAAAUG	0.444444	0.444444	1	Avian	H3N2
;CY077263	GGUCUGAAGGAUAAUCUUCUUGAAAAUUUGCAGGCCUACCAGAAACGGAUGGGAGUGCAAAUG	0.444444	0.444444	1	Avian	H4N6
;CY018016	GGUCUAAAAGAUGAUCUUCUUGGAAAUUUGCAGGCCUACCAGAAACGGAUGGGAGUGCAAAUG	0.444444	0.444444	1	Avian	H11N1
;GQ923462;GQ923438;GQ923166;GU050243;GU050251;GU051942;CY076198;GU052300;HM060052;HM060053;HM060056	GGUCUGAAAGAUGAUCUUCUUGAAAAUUUGCAGGCCUACCAAAAACGGAUGGGAGUGCAAAUG	0.444444	0.444444	11	Avian	Mixed
;CY039687;CY039695;CY039710;CY039718;CY039702;CY075942;CY078306;CY039742;GU052557;CY064945;HM849018;CY076906;CY060244;AY724262;HM849004;HM144730;CY004073;CY004077;CY004087;CY004115;CY004147;CY004155;CY004163;CY004171;CY004179;CY014765;CY005882;CY014651;CY045472	GGUCUGAAAGAUGAUCUUCUUGAAAAUUUGCAGGCCUACCAGAAGCGGAUGGGAGUGCAAAUG	0.444444	0.444444	29	Avian	Mixed
;CY020990;CY021574	GGUCUGAAAGAUAAUCUUCUUGAAAAUUUGCAGGCCUACCAGAAGCGAAUGGGAGUGCAAAUG	0.444444	0.444444	2	Avian	Mixed
;DQ997259	GGUCUGAAAGAUAAUCUUCUUGAAAAUUUGCAGGCCUACCAGAAACGAAUGGGAGUGCAGAUG	0.444444	0.444444	1	Avian	H5N1
;CY003945;EU871929;CY004203;CY004671;CY004818;GQ257456;CY005161;CY005896	GGUCUAAAAGAUGAUCUUCUUGAAAAUUUGCAGGCCUACCAGAAACGAAUGGGAGUGCAAAUG	0.444444	0.444444	8	Avian	Mixed
;CY014688;GQ257441;AY241621;GQ257472;GQ257464;GU053304;GU053311;GU053332;GU053318;GU053325;CY004259	GGUCUAAAAGAUGAUCUUCUUGAAAAUUUGCAGGCCUACCAGAAACGGAUGGGGGUGCAAAUG	0.444444	0.444444	11	Avian	H10N7
;DQ997307	GGUCUGAGAGAUAAUCUUCUUGAAAAUUUGCAGGCCUACCAGAAACGGAUGGGAGUGCAAAUG	0.444444	0.444444	1	Avian	H5N1
;DQ997086	GGUCUGAGAGACAAUCUUCUUGAAAAUUUGCAGGCCUACCAGAAACGGAUGGGAGUGCAGAUG	0.444444	0.444444	1	Avian	H5N1
;EF124048;DQ535725;CY016293;CY021390;CY020662;EF362419	GGUCUGAGAGAUAAUCUUCUUGAAAAUUUGCAGACCUACCAGAAACGAAUGGGAGUGCAGAUG	0.444444	0.444444	6	Avian	H5N1
;CY078131	GGUCUAAAAGAUGAUCUUCUCGAAAAUUUGCAGGCCUACCAGAAGCGGAUGGGAGUGCAGAUG	0.444444	0.419753	1	Avian	H11N9
;HM060043;HM060047;HM060045	GGUCUGAAAGAUGAUCUUCUUGAAAAUUUGCAGGCCUACCAGAAAAGAAUGGGAGUGCAAAUG	0.444444	0.444444	3	Avian	H13N9
;DQ997267;CY077001	GGUCUGAAAGAUGAUCUUCUUGAAAAUUUGCAGGCCUACCAGAAACGAAUGGGAGUGCAGAUG	0.444444	0.444444	2	Avian	Mixed
;CY005044	GGGCUAAAAGAUGAUCUUCUUGAAAAUUUGCAGGCCUACCAGAAACGGAUGGGAGUGCAAAUG	0.444444	0.419753	1	Avian	H3N8
;HM172161;CY063321	GGUCUGAGAGAUAAUCUUCUUGAAAAUUUGCAGGCCUACCAAAAACGAAUGGGAGUGCAAAUG	0.444444	0.444444	2	Avian	H5N1
;CY041898	GGUCUAAAAGAUGACCUUCUUGAAAAUUUGCAGGCCUACCAAAAACGGAUGGGAGUGCAGAUG	0.444444	0.444444	1	Avian	H4N6
;HM172134	GGUCUGAGAGACAAUCUUCUUGAAAAUUUGCAGGCCUACCAGAAACGGAUGGGGGUGCAGAUG	0.444444	0.444444	1	Avian	H5N1
;DQ021756;CY020846	GGUCUGAAAGAUAAUCUUCUUGAAAAUUUGCAGGCCUACCAGAAACGGAUGGGAGUGCAAAUG	0.444444	0.444444	2	Avian	Mixed
;EF587280;EF124188;CY034699;CY040977;CY040929;CY040913;CY029530;AB450634;EU402399;EU401752;EU814504;EU441935;EU486853;EU441927;DQ351859;EF175672;EF175673;HM172127;EU195411;GU182249;GU182233;GU182241;GU182225;HM172164;HM172139;HM172148;HM172136	GGUCUGAGAGACAAUCUUCUUGAAAAUUUGCAGGCCUACCAGAAACGAAUGGGAGUGCAGAUG	0.444444	0.444444	27	Avian	H5N1
;GU186778;CY015054;L37795;L37796;L37797	GGUCUGAAAGAUGAUCUCCUUGAAAAUUUGCAGGCCUACCAGAAACGGAUGGGAGUGCAGAUG	0.444444	0.419753	5	Avian	H7N7
;HM172137	GGUCUUAGAGACAAUCUUCUUGAAAAUUUGCAGGCCUACCAGAAACGGAUGGGAGUGCAGAUG	0.444444	0.444444	1	Avian	H5N1
;GQ923550	GGUCUAAAAGAUGAUCUUCUUGAAAAUUUGCAGGCCUACCAGAAACGGAUGGGAGUGCAGAUA	0.444444	0.444444	1	Avian	H5N2
;CY022718;CY081317	GGUCUAAAAGAUGAUCUUCUCGAAAAUUUGCAGGCCUACCAGAAACGGAUGGGAGUGCAGAUG	0.444444	0.419753	2	Avian	H3N6
;CY021150;CY021438;GU186467;GU051191;GU051185;GU051198;GU051188;GU051097;CY021854;EU871861	GGUCUGAAGGAUGAUCUUCUUGAAAAUUUGCAGGCCUACCAGAAACGGAUGGGAGUGCAGAUG	0.444444	0.444444	10	Avian	Mixed
;FJ534566;FJ534568;FJ534567	GGUCUAAGAGAUAAUCUCCUUGAAAAUUUGCAGGCCUACCAGAAACGAAUGGGAGUGCAGAUG	0.444444	0.419753	3	Avian	H5N1
;CY005795;GQ404580;FJ750570	GGUCUAAAAGAUGAUCUUCUUGAAAAUUUGCAGACCUACCAGAAACGGAUGGGAGUGCAGAUG	0.444444	0.444444	3	Avian	Mixed
;M23917;M63526;M38299	GGUCUGAAAGAUGAUCUCCUUGAAAAUUUGCAGGCCUACCAGAAACGGAUGGGAGUGCAGCUG	0.444444	0.395062	3	Avian	H7N7
;CY079341;CY079349;CY079429	GGUCUAAAAGAUGAUCUCCUUGAAAAUUUGCAGGCCUACCAGAAACGGAUGGGAGUGCAGAUG	0.444444	0.419753	3	Avian	H3N2
;CY004881;CY004861;DQ021742;DQ021743;CY015485	GGUCUAAAAGAUGAUCUUCUUGAAAACUUGCAGGCCUACCAGAAACGGAUGGGAGUGCAAAUG	0.444444	0.419753	5	Avian	Mixed
;CY021198	GGUCUAAAGGAUGAUCUUCUUGAAAAUUUGCAGGCCUACCAAAAACGGAUGGGAGUGCAAAUG	0.444444	0.444444	1	Avian	H6N8
;CY032667;CY032715;CY033431;CY076670;CY032887;CY032927;CY076078;CY076038;CY078219;CY078226;CY032911;CY064186	GGUCUAAAGGAUGAUCUUCUUGAAAAUUUGCAGGCCUACCAGAAGCGGAUGGGAGUGCAGAUG	0.444444	0.444444	12	Avian	Mixed
;HM172129	GGUCUGAGAGAUAAUCUUCUUGAAAAUGUGCAGGCCUACCAGAAACGAAUGGGAGUGCAGAUG	0.444444	0.419753	1	Avian	H5N1
;CY014794	GGUCUAAAAGAUGAUCUUCUUGAAAAUUUGCAGGCCUACCAGAAACGGAUGGGAGUGCAAAUR	0.444444	0.444444	1	Avian	H5N2
;CY064226;CY039813;CY045424;CY043969;CY079196;CY079662;CY080176;CY067689;HM144754;AJ973609;CY005394;EU249550;AB538495	GGUCUGAAAGAUGAUCUUCUUGAAAAUUUGCAGGCCUACCAGAAACGAAUGGGAGUGCAAAUG	0.444444	0.444444	13	Avian	Mixed
;AY241600;GQ923566	GGUCUAAAAGAUGAUCUUCUUGAAAACUUGCAGGCCUACCAGAAACGGAUGGGAGUGCAGAUG	0.444444	0.419753	2	Avian	Mixed
;CY005264;CY004650;CY005058;DQ021698;DQ021709;GU051262;GU051532;GU051528;DQ021723;GU051459;GU051240;CY077342;CY078484;CY078492;CY078516;CY078532;CY078548;CY078644;CY078700;CY079028;CY079694;CY079757;CY079702;CY079733;CY079116;CY079655;CY004081	GGUCUAAAAGAUGAUCUUCUUGAAAAUUUGCAGGCCUACCAGAAGCGGAUGGGAGUGCAAAUG	0.444444	0.444444	27	Avian	Mixed
;AM913984;CY061888;EU662949	GGUCUGAAAGAUGAUCUUCUUGAAAAUUUGCAGGCCUACCAGAAAAGGAUGGGAGUGCAAAUG	0.444444	0.444444	3	Avian	Mixed
;CY015104	GGUCUAAAAGAUAAUCUUCUUGAAAAUUUGCAGGCCUACCAGAAACGGAUGGGAGUGCAAAUG	0.444444	0.444444	1	Avian	H5N9
;AY633309;CY004187;CY004195;CY004211;CY004219;CY005107;AY633317;CY004516;CY004524;DQ021755;CY012833;CY015452;CY016125;CY016133;CY016165;DQ021691;DQ021694;GU050654;GU051444;GU051515;GU051523;DQ021696;GU051517;DQ021711;DQ021715;DQ021758;DQ021718;GU050731;GU051526;DQ021760;CY020870;CY020958;GU051434;DQ021763;DQ021744;CY016173;CY020974;CY021206;CY021678;CY014910;GU049952	GGUCUGAAAGAUAAUCUUCUUGAAAAUUUGCAGGCCUACCAGAAGCGGAUGGGAGUGCAAAUG	0.444444	0.444444	41	Avian	Mixed
;AY221538;AF509041;AF509042;CY029698;GU050422;GU050429;GU050492;GU052534;HM114556;GU050476;GU050484;CY029722;GU050406;GU050460;GU050508;GU050516;CY029714;GU050437;GU050500;GU050540;HM114564;GU050524;GU050532;FJ538948;CY036104;CY036112;CY036120;CY036128;CY036152;GU050311;GU050318;GU050326;GU050342;GU050334;GQ232444;HM114612;GU050452;GU050468;HM114604;HQ200560;HQ338095;CY029967;CY029975;CY029991;CY…	GGUCUAAGAGAUAAUCUUCUUGAAAAUUUGCAGGCCUACCAGAAACGAAUGGGAGUGCAGAUG	0.444444	0.444444	45	Avian	H5N1
;DQ376667;DQ376673;DQ376671	GGUCUGAGAGAUGAUCUUCUUGAAAAUUUGCAGGCCUACCAGAAAAGGAUGGGAGUGCAAAUG	0.444444	0.444444	3	Avian	Mixed
;GQ923518;GQ923414;GQ923398;GU050183	GGUCUGAAAGACGAUCUUCUUGAAAAUUUGCAGGCCUACCAGAAACGGAUGGGGGUGCAAAUG	0.444444	0.444444	4	Avian	H5N2
;GU051498	GGUCUAAAAGAUGAUCUUCUUGAAAAUUUGCAGGCCUACCAGAAACGGAUGGGAGUGCAGGUG	0.444444	0.444444	1	Avian	H7N3
;CY045586;HM461853;M12699;CY014969;EU743294;AF073202;CY005874;EU982317;CY004130;CY004138;CY004968;CY005867;CY014734;CY014779;GU186611;DQ021754;CY004428;CY017076;CY005219;GU050861;DQ021769;EU743168;CY014850;CY014962;CY004373;GU052217;CY004614;CY017412;CY017702;AY664434;CY004584;CY014930;CY041842;AY664433;CY004390;CY004825;CY014814;GU052011;CY004763;GU052006;CY017782;CY020926;CY081293;EU743287;AY63…	GGUCUAAAAGAUGAUCUUCUUGAAAAUUUGCAGGCCUACCAGAAACGGAUGGGAGUGCAAAUG	0.444444	0.444444	595	Avian	Mixed
;CY078604	GGUCUAAAAGAUGAUCUUCUUGAAAAUUUGCAGGCCUACCAGAAAAGGAUGGGAGUGCAGAUG	0.444444	0.444444	1	Avian	H3N8
;CY021614;CY005331;GU186447;CY011037;CY020774;GU053239;CY064066	GGUCUAAAAGAUGAUCUUCUUGAAAAUUUGCAGGCCUACCAGAAACGAAUGGGAGUGCAGAUG	0.444444	0.444444	7	Avian	Mixed
;CY077625	GGCCUGAAAGAUGAUCUUCUUGAAAAUUUACAGGCCUACCAGAAACGGAUGGGAGUGCAAAUG	0.444444	0.419753	1	Avian	H4N8
;AF216719;GU052051;GU052058	GGUCUGAAAGAUAACCUUCUUGAAAAUUUGCAGGCCUACCAGAAACGAAUGGGAGUGCAAAUG	0.444444	0.444444	3	Avian	H5N1
;HQ221641	GGUCUGAAAGAAGAUCUUCUUGAAAAUUUGCAGGCCUACCAGAAACGGAUGGGGGUGCAAAUG	0.444444	0.444444	1	Avian	H9N2
;GU052020;GU052043;DQ997457;AY059508;AY059509	GGUCUGAAAGAUAAUCUUCUUGAAAAUUUGCAGGCCUACCAGAAACGAAUGGGAGUGCAAAUG	0.444444	0.444444	5	Avian	H5N1
;AF216711;AF216727;GU052028;GU052082;AY075029	GGUCUGAAAGAUAAUCUUCUUGAAAAUUUGCAGGCCUACCAGAAACGAAUGGGAGUGCAAGUG	0.444444	0.444444	5	Avian	H5N1
;GU053151;CY077009	GGUCUGAAGGAUGAUCUCCUUGAAAAUUUGCAGGCCUACCAGAAACGGAUGGGAGUGCAAAUG	0.444444	0.419753	2	Avian	H7N7
;CY064122	GGUCUGAAAGAUGAUCUUCUUGAAAAUUUGCAGGCCUACCAGAACCGGAUGGGAGUGCAGAUG	0.444444	0.444444	1	Avian	H8N4
;CY038373;CY022638;EU580596;GQ162787;AB546152;HM144788	GGUCUGAAAGAUGAUCUUCUCGAAAAUUUGCAGGCCUACCAGAAACGGAUGGGAGUGCAAAUG	0.444444	0.419753	6	Avian	Mixed
;CY035810;CY035818;CY035880;CY038365;CY039821;CY039876;CY043985;CY044025;CY077381;CY077413;CY078924;CY080200;CY078948;CY079012;CY077207;CY047036;CY043961;CY005448;CY005454;CY060361;CY015164;HM144855;DQ482657;DQ482662;EF527270;EF617307;DQ482658;EF527271;EF527272;GQ219713;GQ219716;GQ414930;HM144732;CY021526;CY022630;CY076938;AJ427299;HQ014835	GGUCUGAAGGAUGAUCUUCUUGAAAAUUUGCAGGCCUACCAGAAACGGAUGGGAGUGCAAAUG	0.444444	0.444444	38	Avian	Mixed
;GU351861	GGUCUAAAAGAUGAUUUGCUUGAAAAUUUGCAGGCCUACCAGAAACGGAUGGGAGUGCAAAUG	0.444444	0.419753	1	Avian	H5N2
;AY664423;AY664424;AY664435;DQ021720;GU051426	GGUCUAAAAGAUGAUCUUCUUGAAAAUUUGCAGGCCUACCAAAAGCGGAUGGGAGUGCAAAUG	0.444444	0.444444	5	Avian	Mixed
;CY003888;CY003915;CY003902;CY004095;CY004392;CY005298;CY005121;CY005281;CY004413;CY005127;CY005114;CY004089;CY005292;CY015136;CY015143;CY015128;CY014646;EU742645;CY014756;CY003923;CY005376	GGUCUAAAAGAUGAUCUUCUUGAAAAUCUGCAGGCCUACCAGAAACGGAUGGGAGUGCAAAUG	0.444444	0.419753	21	Avian	Mixed
;AF144306;AY221534;AY221535	GGUCUGAAAGAUAAUCUUCUUGAAAAUUUGCAGGCCUACCAAAAACGAAUGGGAGUGCAAAUG	0.444444	0.444444	3	Avian	H5N1
;CY020966;CY076054;CY076502;CY076510;CY076518;CY076526;CY076534;CY076542;CY076550;CY076494;CY041251;GU052581;AB304150;HQ014827	GGUCUGAAAGAUGAUCUUCUUGAAAAUUUGCAGGCCUACCAGAAACGGAUGGGGGUGCAAAUG	0.444444	0.444444	14	Avian	Mixed
;AF468843;DQ304691;EU263348;EU263356;AY651400;AY651402;GU186681;AY856865	GGUCUGAGAGAUAAUCUUCUUGAAAAUUUGCAGGCCUACCAGAACCGGAUGGGAGUGCAAAUG	0.444444	0.444444	8	Avian	H5N1
;CY021358;CY021494	GGUCUGAAAGACGAUCUUCUUGAAAAUUUGCAGGCCUACCAGAAACGGAUGGGAGUGCAGAUG	0.444444	0.444444	2	Avian	H7N3
;CY067697;CY067713	GGUCUGAAGGAUGAUCUUCUUGAAAAUUUGCAGGCCUACCAGAAGCGGAUGGGAGUGCAAAUG	0.444444	0.444444	2	Avian	H6N2
;CY016612;EU980480;GU053460;GU053468;GU053490;GU053498;DQ376679;DQ376675;DQ376681;DQ376676;DQ376677	GGUCUGAGAGAUGAUCUUCUUGAAAAUUUGCAGGCCUACCAGAAACGGAUGGGAGUGCAAAUG	0.444444	0.444444	11	Avian	Mixed
;CY078123	GGUCUGAAAGAUGAUCUUCUUGAAAACUUGCAGGCCUACCAGAAGCGGAUGGGAGUGCAAAUG	0.444444	0.419753	1	Avian	H4N6
;HQ221640	GGUCUGAAAGAAGAUCUUCUUGAAAAUUUGCAGGCCUACCAGAAACGGAUGGGAGUGCAAAUG	0.444444	0.444444	1	Avian	H9N2
;CY004947;GQ923174;CY031037;CY053886;CY081341;CY005539	GGUCUAAAAGAUGAUCUUCUUGAAAAUUUGCAGGCCUACCAAAAACGGAUGGGAGUGCAGAUG	0.444444	0.444444	6	Avian	Mixed
;AY950238;DQ997226;DQ997119;DQ997138;DQ073418;AY950242;DQ997214;AF250492	GGUCUGAAAGAUGAUCUUCUUGAAAAUUUGCAGGCCUUCCAGAAACGGAUGGGAGUGCAAAUG	0.444444	0.444444	8	Avian	H5N1
;AB538493;AB538494;AB538496;AB538497	GGUCUGAAAGACGAUCUUCUUGAAAAUUUGCAGGCCUACCAGAAACGGAUGGGAGUGCAAAUG	0.444444	0.444444	4	Avian	Mixed
;GQ257382	GGUCUGAAGGAUGAUCUUCUUGAAAAUUUGCAGACCUACCAGAAACGGAUGGGAGUGCAGAUG	0.444444	0.444444	1	Avian	H7N2
;CY037757	GGUCUGAAAGAUGAUCUUCUUGAAAAUUUGCAGGCCUACCAGAAAMGGAUGGGAGUGCAAAUG	0.444444	0.444444	1	Avian	H7N3
;DQ256384	GGACUAAGGGAUGAUCUUCUUGAAAAUUUGCAGGCCUACCAGAAACGGAUGGGAGUGCAAAUG	0.444444	0.419753	1	Avian	H5N2
;AY497132;GU052726;AY497134;GU052637	GGGCUAAGGGAUGAUCUUCUUGAAAAUUUGCAGGCCUACCAGAAACGGAUGGGAGUGCAAAUG	0.444444	0.419753	4	Avian	H5N2
;CY004346;CY005181;CY003985;CY004703;CY005318;CY004954;CY047513;CY004353;CY073723;CY055162;CY038389;CY039853;CY078996;CY039797;CY039829;CY077397;CY079060;CY039766;CY039861;CY039869;CY043953;CY045448;CY045456;CY077255;CY077365;CY078900;CY078980;CY079300;CY078892;CY079036;CY078964;CY079068;CY079076;CY079188;CY079615;CY080048;CY080004;CY076318;CY039535;CY076686;CY076478;CY038381;CY004339;CY032723;CY…	GGUCUGAAAGAUGAUCUUCUUGAAAAUUUGCAGGCCUACCAGAAACGGAUGGGAGUGCAGAUG	0.444444	0.444444	116	Avian	Mixed
;DQ376672	GGUCUGAGAGAUGAUCUUCUUGAAAAUUUGCAGGCCUACCAAAAAAGGAUGGGAGUGCAAAUG	0.444444	0.444444	1	Avian	H6N1
;AY059511;AY059512;GU052066;GU052074;AY075035;GU052090;AY221530;AY221531;AY221533;GU052466;AF509040;AF509043;AF509044;AF509050;AF509052;AF509049;AF509058;AF509062;AF509064;DQ997520;AB212283;DQ997179;DQ997409;EU329183;AY221532;AY747620;EF541393;GU052106;GU052114;DQ351858;DQ320989;DQ320990;DQ320991;GU186693;AF509063;AY575899;AY575903;AY575902;GU186673;DQ997402;DQ835774;AY518361;AY737298;DQ320944;AY…	GGUCUGAGAGAUAAUCUUCUUGAAAAUUUGCAGGCCUACCAGAAACGAAUGGGAGUGCAGAUG	0.444444	0.444444	871	Avian	H5N1
;M63527;CY014572;CY021446;EU980455;CY011249;CY004995;CY079647;DQ021734;EU743561;CY076638;DQ021748;GU050590;GU050597;GU050604;GU050611;GU050848;GU051554;GU050827;GU050841;GU050855;GU051560;GU050765;GU051538;GU051565;DQ236168;CY076022;GQ923254;GU186532;HM060054;CY021686;CY032675;CY035860;CY034175;CY033335;CY033351;CY034188;CY078083;GQ257397;GQ923478;GQ923470;CY045392;CY076841;CY076174;CY033367;CY07…	GGUCUGAAAGAUGAUCUUCUUGAAAAUUUGCAGGCCUACCAGAAACGGAUGGGAGUGCAAAUG	0.444444	0.444444	905	Avian	Mixed
;EU743266;AY241596;AY241598;EU742897;EU742882;AY241593	GGUCUAAGAGAUGAUCUUCUUGAAAAUUUGCAGGCCUACCAGAAACGGAUGGGAGUGCAAAUG	0.444444	0.444444	6	Avian	H7N2
;CY039384	GGUYUAAAAGAUGAUCUUCUUGAAAAUUUGCAGGCCUACCAGAAACGGAUGGGAGUGCAAAUG	0.411765	0.411765	1	Avian	H2N3
;GQ404614;CY062500	GGUCUGAAAGAUGAUCUUCUUGAAAAUUUGCAGGCCUACCAGAAGCGGAUGGGAGUGCAGAUG	0.444444	0.444444	2	Avian/Human	Mixed
;HM114620;GU186762	GGUCUGAGAGAUAAUCUUCUUGAAAAUUUGCAGGCCUACCAGAAACGAAUGGGGGUGCAGAUG	0.444444	0.444444	2	Avian/Human	H5N1
;EU182312;AY497136;CY005832;GU186588;GU052683;GU052699;AB434347	GGUCUAAAAGAUGAUCUUCUUGAAAAUUUGCAGGCCUACCAGAAACGGAUGGGAGUGCAAAUA	0.444444	0.444444	7	Avian/Swine	Mixed
;DQ492909;AY747612	GGUCUGAGAGAUGAUCUUCUUGAAAAUUUGCAGGCCUACCAGAAACGAAUGGGAGUGCAGAUG	0.444444	0.444444	2	Avian/Swine	H5N1
;CY077498;FJ560885;GU433355;GU433370;GU433362;GU433346;CY015040	GGUCUGAAAGAUGAUCUUCUUGAAAACUUGCAGGCCUACCAGAAACGGAUGGGAGUGCAGAUG	0.444444	0.419753	7	Canine	H3N2
;AF216735	GGUCAGAAAGAUAAUCUUCUUGAAAAUUUGCAGGCCUACCAGAAACGAAUGGGAGUGCAAGUG	0.444444	0.444444	1	Environment	H5N1
;HQ454980	GGUCUGAAAGAUGAUCUUCUUGAAAACUUGCAGGCCUACCAGAAACGAAUGGGAGUGCAGAUG	0.444444	0.419753	1	Feline	H3N2
;GQ232065;GQ323474;CY050215;CY052816;CY052928;CY052227;CY062519;CY064709;CY064717;CY064725;CY068923;CY083466;CY083586;CY050231;CY064733;GQ225384;GQ223409;GQ232055;GQ232071;GQ283490;GQ323465;GQ334356;GQ365456;GQ402219;GQ465692;CY046204;CY046212;CY046220;CY046228;CY046236;CY046252;CY046260;CY046268;CY046276;CY046292;CY046300;CY046308;CY046324;CY046332;CY046348;CY046356;CY046372;CY046388;CY046396;CY…	GGUCUGAAAGAUGAUCUUCUUGAAAAUUUGCAGGCCUACCAGAAGCGAAUGGGAGUGCAGAUG	0.444444	0.444444	198	Human	H1N1
;CY065052;CY072327;CY063180;CY066680	GGUCUGAAGGAUGACCUUCUUGAAAAUUUGCAGGCCUACCAGAAGCGAAUGGGAGUGCAGAUG	0.444444	0.444444	4	Human	H1N1
;HM114588;HM114596	GGUCUAAGAGAUAAUCUUCUUGAAAAUUUGCAGGCCUACCAGAAACGAAUGGGAGUGCAAAUG	0.444444	0.444444	2	Human	H5N1
;EU597959	GGUCUAAGAGAUGACCUUCUUGAAAAUUUGCAGACCUACCAGAAACGAAUGGGGGUGCAGAUG	0.444444	0.444444	1	Human	H3N2
;EU597969	GGUCUAAGAGAUGAUCUUCUUGAAAAUUUGCAGACCUACCAGAAGCGAAUGGGGGUGCAGAUG	0.444444	0.444444	1	Human	H3N2
;GQ365365;CY061020	GGUCUGAAAGAUGACCUUCUUGAAAAUUUGCAGGCCUACCAGAAUCGAAUGGGAGUGCAGAUG	0.444444	0.444444	2	Human	H1N1
;CY081072;CY081088	GGUCUGAAAGAUGACCUUCUUGAAAAUUUGCAGGCCUACCAGAAGAGAAUGGGAGUGCAGAUG	0.444444	0.444444	2	Human	H1N1
;CY071104	GGUCUGAAAGAUGACCUUCUUGAAAAUUUGCAGGCCUACCAGAAGCGAAUGGGUGUGCAGAUG	0.444444	0.444444	1	Human	H1N1
;HM780479	GGUCUGAAAGAUGACCUUCUUGAAAUUUUGCAGGCCUACCAGAAGCGAAUGGGAGUGCAGGUG	0.444444	0.419753	1	Human	H1N1
;CY009325	GGUCUGAAAGAUGAUCUUCUUGAAAAUUUGCAGGCCUACCAGAAACGAAUGGGGGUGCAGAUA	0.444444	0.444444	1	Human	H1N1
;GQ168674	GGUCUGAAAGAUGACCUUCUUGAAAAUUUGCAGGCCUACCARAAGCGAAUGGGAGUGCAGAUG	0.444444	0.444444	1	Human	H1N1
;CY050952	GGUCUGAAAGAUGAYCUUCUUGAAAAUUUGCAGGCCUACCAGAAGCGAAUGGGAGUGCAGAUG	0.444444	0.444444	1	Human	H1N1
;HM114572	GGUCUAAGAGAUAAUCUUCUUGAUAAUUUGCAGGCCUACCAGAAACGAAUGGGAGUGCAGAUG	0.444444	0.444444	1	Human	H5N1
;CY011137;CY000466;CY000594;CY000634;CY000642;CY000730;CY000810;CY000818;CY000826;CY000998;CY001006;CY001177;CY001270;CY001446;CY001529;CY003257;CY003233;CY003225;CY003449;CY009101;CY009109;CY023043;EU597957;EU597960;EU597961;EU597962;EU597963;EU597965;EU597966;EU597968;CY000690;CY001246;CY003457;CY003273;CY003786;CY000706;CY001366;CY001358;CY000602;CY001350;CY000746;CY003818;CY003281;CY013049;CY…	GGUCUAAGAGAUGAUCUUCUUGAAAAUUUGCAGACCUACCAGAAACGAAUGGGGGUGCAGAUG	0.444444	0.444444	70	Human	H3N2
;CY056932;CY083871;GU367328	GGUCUAAAAGAUGACCUUCUUGAAAAUUUGCAGGCCUACCAGAAGCGAAUGGGAGUGCAGAUG	0.444444	0.444444	3	Human	H1N1
;CY052368	GGUCUGAAAGAUGAUCUUCUUGAAAAUUUGCAGGCCUACCAGRAGCGAAUGGGAGUGCAGAUG	0.444444	0.444444	1	Human	H1N1
;CY083538	GGUCUGAAAGAUGACCUCCUUGAAAAUUUGCAGGCCUACCAGAAGCGAAUGGGAGUGCAGAUG	0.444444	0.419753	1	Human	H1N1
;CY080318	GGUCUGAAAGAUGACCUUCUUGAAAUUUUGCAGGCCUACCAGAAGCGAAUGGGAGUGCACAUG	0.444444	0.395062	1	Human	H1N1
;CY063268	GGUCUGAAAGAUGACCUUCUUGAAAAUUUGCAGGCCUACCAGAAGCGUAUGGGAGUGCAGAUG	0.444444	0.444444	1	Human	H1N1
;CY083235	GGUCUGAAAGAUGCCCUUCUUGAAAAUUUGCAGGCCUACCAGAAGCGAAUGGGAGUGCAGAUG	0.444444	0.444444	1	Human	H1N1
;U02084;CY045781	GGUCUGAAAGAUAAUCUUCUUGAAAAUUUGCAGGCCUACCAAAAACGAAUGGGAGUGCAGAUG	0.444444	0.444444	2	Human	H1N1
;CY083067;CY083091;CY083075;CY071336	GGUCUGAAAGAUGACCUUCUUGAUAAUUUGCAGGCCUACCAGAAGCGAAUGGGAGUGCAGAUG	0.444444	0.444444	4	Human	H1N1
;GQ168630	GGUYUGAAAGAUGACCUUCUUGAAAAUUUGCAGGCCUACCAGAAGCGAAUGGGAGUGCAGAUG	0.411765	0.411765	1	Human	H1N1
;CY057303	GGUCUGAAAGAUGACCUUCUUGAAAAUUUGCAGGCMUACCAGAAGCGAAUGGGAGUGCAGAUG	0.411765	0.411765	1	Human	H1N1
;GQ222028	GGUCUGAAAGAUGACCUUCUUGAAAAUUURCAGGCCUACCAGAAGCGAAUGGGAGUGCAGAUG	0.411765	0.411765	1	Human	H1N1
;CY077802	GGUCUAAAAGAUGAUCUUCUUGAAAAUUUGCAGRCCUAUCAGAAACGAAUGGGGGUGCAGAUG	0.411765	0.411765	1	Human	H3N2
;EF566312;CY045256;GQ404643;CY051128	GGUCUGAAAGAUGAUCUUCUUGAAAAUUUGCAGGCCUACCAGAAGCGAAUGGGAGUGCAAAUG	0.444444	0.444444	4	Human/Avian	Mixed
;FJ966962;FJ966972;FJ966975;FJ969513;FJ969518;FJ969527;FJ969532;FJ969537;FJ973553;FJ973554;FJ985755;FJ998210;FJ998211;GQ117055;GQ117066;GQ117073;GQ117078;GQ117096;GQ122095;GQ131025;CY039894;CY039902;GQ132152;GQ149624;GQ149625;GQ149629;GQ149642;GQ149679;GQ160525;GQ160549;GQ160555;GQ168619;GQ168622;GQ168626;GQ168635;GQ168647;GQ168663;GQ168675;GQ169302;GQ166229;GQ200207;GQ200216;GQ200272;FJ966954;GQ…	GGUCUGAAAGAUGACCUUCUUGAAAAUUUGCAGGCCUACCAGAAGCGAAUGGGAGUGCAGAUG	0.444444	0.444444	2624	Human/Swine	H1N1
;CY071757;CY052712;CY056980	GGUCUGAAAGAUGACCUUCUUGAAAAUUUGCAGGCCUACCAGAAGCGAAUGGGAGUGCAAAUG	0.444444	0.444444	3	Human/Swine	H1N1
;CY022987;CY025254;GQ404616;GQ404617;CY051688;CY066960;CY073726;CY083699;CY066720;CY057711	GGUCUGAAAGAUGACCUUCUUGAAAAUUUGCAGGCCUACCAGAAACGAAUGGGAGUGCAGAUG	0.444444	0.444444	10	Human/Swine	H1N1
;GQ369405;GQ369411;CY066200;CY066320;CY066192	GGUCUGAGAGAUGACCUUCUUGAAAAUUUGCAGGCCUACCAGAAGCGAAUGGGAGUGCAGAUG	0.444444	0.444444	5	Human/Swine	H1N1
;CY056157;CY065020;CY062980;CY078423;CY078426	GGUCUGAAAGAUGACCUUCUUGAAAAUUUGCAGGCCUACCAGAAGCGAAUGGGGGUGCAGAUG	0.444444	0.444444	5	Human/Swine	Mixed
;CY052880;CY055741;CY055757;CY056692;CY056716;CY057247;CY060521;CY061752;CY061760;CY066272;CY066392;CY066496;CY061252;CY062652;HM230694;CY056948;CY083777;CY057783;CY063124;CY076750	GGUCUGAAAGAUGACCUUCUUGAAAAUUUGCAGGCCUACCAGAAGCGGAUGGGAGUGCAGAUG	0.444444	0.444444	20	Human/Swine	H1N1
;CY062860;CY062908;CY066808	GGUCUGAAAGAUGACCUUCUUGAAAAUUUGCAGGCCUACCAAAAGCGAAUGGGAGUGCAGAUG	0.444444	0.444444	3	Human; Swine	H1N1
;CY080108;CY014711;GU052308;DQ186977;EU478824;DQ186978;GQ161107	GGUCUGAAAGAUGAUCUUCUUGAAAAUUUGCAGGCCUACCAGAAACGGAUGGGAGUGCAAAUA	0.444444	0.444444	7	Mixed	Mixed
;AB441171	GGUCUAAAAGAUGAUCUUCUUGAAAAUUUGCAGGCCUACCAGAAGCGAAUGGGAGUGCAGAUG	0.444444	0.444444	1	Swine	H1N2
;M63525	GGUCUGAAAGAUGAUCUUCUUGAAAAUUUGCAGGCCUACCAGAAACGGAUGGGGGUGCAGAUU	0.444444	0.444444	1	Swine	H1N1
;CY077945	GGUCUGAAAGAUGAUCUCCUUGAAAAUUUGCAGGCCUACCAGAAACGGAUGGGGGUGCAGAUG	0.444444	0.419753	1	Swine	H3N2
;AB434371	GGUCUGAAAGAUGAUCUUCUUGAAAACUUGCAGGCCUACCAAAAACGGAUGGGAGUGCAGAUA	0.444444	0.419753	1	Swine	H3N2
;Z26862	GGUCUGAAAGAUGAUCUUCUUGAAAAUUUGCAGGCCUACCAAAAACGGAUGGGAGUGCAGAUG	0.444444	0.444444	1	Swine	H1N1
;CY026428;GQ404610;CY045741;CY045749;GQ404581;M63534;CY009629;CY027292	GGUCUGAAAGAUGAUCUUCUUGAAAAUUUGCAGGCCUACCAGAAACGAAUGGGGGUGCAGAUG	0.444444	0.444444	8	Swine	H1N1
;EU478835;EU478840	GGUCUGAAAGAUGACCUUCUUGAAAAUUUGCAGGCCUACCAAAAACGAAUGGGAGUGCAGAUA	0.444444	0.444444	2	Swine	H3N2
;CY037947;CY037955	GGUCUGAAAGAUGACCUCCUUGAAAAUUUGCAGGCCUACCAGAAACGGAUGGGAGUGCAGAUA	0.444444	0.419753	2	Swine	H1N1
;CY009381;EU478804;CY085729;CY010573;EU478820;EU478817;EU478823;CY010581;EU478837;EU478845;EU478846;EU478834;EU478844;EU478836;FJ798779	GGUCUGAAAGAUGACCUUCUUGAAAAUUUGCAGGCCUACCAGAAACGGAUGGGAGUGCAAAUA	0.444444	0.444444	15	Swine	H1N1
;M63537;CY014649;AM920734;AJ316049;AJ316052;EF101742;EU478821;CY085777;CY061648;CY061672;CY061688;CY061680;CY061704;CY061712;CY061720;CY009373	GGUCUGAAAGAUGAUCUUCUUGAAAAUUUGCAGGCCUACCAGAAACGGAUGGGAGUGCAGAUA	0.444444	0.444444	16	Swine	H1N1
;DQ186984	GGUCUGAAAGAUGACCUUCUUGAAAACUUGCAGGCCUACCAGAAACGGAUGGGAGUGCAGAUA	0.444444	0.419753	1	Swine	H3N2
;CY061664	GGUCUGAAGGAUGACCUUCUUGAAAAUUUGCAGGCCUACCAGAAACGAAUGGGAGUGCAGAUA	0.444444	0.444444	1	Swine	H1N2
;AM920745	GGUCUGAAAGAUGACCUUCUUGAAAAUUUGCAGGCCUACCAGAAACGAAUGGGAGUGCAGAUA	0.444444	0.444444	1	Swine	H3N2
;CY085841	GGUCUGAAAGAUGACCUUCUUGAAAAUUUGCAGGCCUACCAGAAACGUAUGGGAGUGCAGAUA	0.444444	0.444444	1	Swine	H1N1
;M63519;CY032214;DQ186980	GGUCUGAAAGAUGAUCUUCUUGAAAAUUUGCAGGCCUACCAGAAGCGAAUGGGGGUGCAGAUG	0.444444	0.444444	3	Swine	Mixed
;EU478803;FJ536831;FJ536768;FJ536823;FJ536820;FJ536803;FJ536782;FJ536779;FJ536811;FJ536793;FJ536771;GU086068;GU086076;CY061640	GGUCUGAAAGAUGACCUUCUUGAAAAUUUGCAGGCCUACCAGAAGCGGAUGGGAGUGCAGAUA	0.444444	0.444444	14	Swine	H1N1
;CY021382;DQ997304;DQ186973;EU478795;EU478797;EU478798;DQ186979;AJ316059;CY077922;AM157374;EU478796	GGUCUGAAAGAUGAUCUUCUUGAAAAUUUGCAGGCCUACCAGAAACGGAUGGGGGUGCAGAUG	0.444444	0.444444	11	Swine	Mixed
;M55481	GGUCUGAAAGAUGAUCUUCUUGAAAAUUUGCAGGCCUACCAGAGACGAAUGGGGGUGCAGAUG	0.444444	0.444444	1	Swine	H1N1
;GU086060	GGUCUGAAAGAUGACCUUCUUGAAAAUUUGCAGCCCUACCAGAAGCGGAUGGGAGUGCAGAUA	0.444444	0.419753	1	Swine	H1N1
;AB434379	GGUCUGAAGGAUGACCUUCUUGAAAAUUUGCAGGCCUACCAGAAGCGGAUGGGAGUGCAAAUA	0.444444	0.444444	1	Swine	H3N2
;CY037986	GGUCUGAAGGAUGAUCUUCUUGAAAAUUUGCAGGCCUACCAGAAACGGAUGGGGGUGCAGAUG	0.444444	0.444444	1	Swine	H1N1
;CY061696	GGUCUGAAAGAUGAUCUUCUUGAAAAUUUGCAGGCCUACCAGAAACGGAUGGGAGUGCAGACA	0.444444	0.419753	1	Swine	H1N1
;EU516314	GGUCUGAAAGAUGAUCUUCUUGAAAAUUUGCAGGCCUACCAGAAACGGAUGGGGAUGCAGAUG	0.444444	0.444444	1	Swine	H9N2
;DQ186982;AM920726;CY077937;EU478800;Z26861;DQ186981;CY037909;CY038026;CY037924;CY038010;AM746618;EU478801;GQ404620;EU478799;CY037939;AM920731;DQ186983;AJ293938;AB434339;EU152199;DQ186975;DQ186976;AM920740;EU478814;FJ805964;EU478805;EU478806;FJ415612;GQ229287;CY085569;CY085553;CY085649;CY085689;GQ229327;CY083011;CY085849;CY085761;CY085889;CY085801;CY085897;CY085905;CY085793;CY085833;CY085809;CY08…	GGUCUGAAAGAUGACCUUCUUGAAAAUUUGCAGGCCUACCAGAAACGGAUGGGAGUGCAGAUA	0.444444	0.444444	77	Swine	H1N1
;CY037917	GGUCUGAAAGAUGACCUUCUUGAAAAUUUGCAGGCCUACCAAAAACGGAUGGGAGUGCAGAUA	0.444444	0.444444	1	Swine	H1N1
;GQ404607	GGUCUGAAAGAUGAUCUUCUUGAAAAUUUGCAGGCCUAYCAGAAACGRAUGGGAGUGCAGAUG	0.411765	0.411765	1	Swine	H3N2
;EU742621;EU980524;DQ186974;AJ293925;GQ229263;GQ229359	GGUCUGAAAGAUGACCUUCUUGAAAAUUUGCAGGCCUACCAGAAACGGAUGGGAGUGCAGAUG	0.444444	0.444444	6	Swine/Avian	Mixed
;CY075958	GGUCUAAAAGAUGAUCUUCUUGAAAAUUUGCAGGCUUACCAGAAACGAAUGGGAGUGCAAAUG	0.388889	0.388889	1	Avian	H11N9
;EU580589;GU052223;GU052234;GU052240;EU580591;GQ907311;GQ907319;CY070869;CY070885;EU030979;CY045384;CY043889;CY043897	GGUCUGAAAGAUGAUCUUCUUGAAAAUUUGCAGGCCUAUCAGAAACGAAUGGGAGUGCAAAUG	0.388889	0.388889	13	Avian	H13N6
;GU049866	GGUCUGAAAGAUGAUCUUCUUGAAAAUUUGCAGGCCUAUCAGAAAAGGAUGGGAGUGCAGAUG	0.388889	0.388889	1	Avian	H5N2
;GU051102;CY041427;CY077127	GGUCUGAAGGAUGAUCUUCUUGAAAAUUUGCAGGCCUAUCAGAAACGGAUGGGAGUGCAGAUG	0.388889	0.388889	3	Avian	Mixed
;GQ404577	GGUCUAAAAGAUGAUCUUCUUGAAAAUUUGCAGGCCUAUCAGAAACGGAUGGGGGUGCAGAUG	0.388889	0.388889	1	Avian	H4N8
;AY497131;GU052707;GU052613;GU052733;GU052714	GGUUUAAGAGAUGAUCUUCUUGAAAAUUUGCAGGCCUACCAGAAACGGAUGGGAGUGCAAAUG	0.388889	0.388889	5	Avian	H5N2
;DQ376686;DQ376688	GGUUUGAGAGAUGAUCUUCUUGAAAAUUUGCAGGCCUACCAGAAACGGAUGGGAGUGCAAAUG	0.388889	0.388889	2	Avian	H6N1
;CY078099	GGUCUGAAAGAUGAUCUUCUUGAAAAUUUGCAGGCCUAUCAAAAACGGAUGGGAGUGCAGAUG	0.388889	0.388889	1	Avian	Mixed
;CY078003	GGUUUAAAAGAUGAUCUUCUUGAAAAUUUGCAGGCCUACCAGAAACGGAUGGGAGUGCAGAUG	0.388889	0.388889	1	Avian	H10N7
;AY241605;CY011057;EU743466;GU051212;EU743458;GU051314;GQ923246;GQ923150;CY064002;CY064074;CY064082;CY064170;CY080288;CY078242;CY064146;CY079517;AY300968;AY300969;AY300970;AY300974;GU051873;CY016189;GQ257434;GU049944;GU049960;CY020734;CY011029;EU026015;EU026023;EU026052;EU026059;EU026075;EU026091;EU026038;EU026030;EU026045;EU026067;CY032206;EU743585;EU743577;EU743569;EU743593;GU050680;EU980502;CY…	GGUCUAAAAGAUGAUCUUCUUGAAAAUUUGCAGGCCUAUCAGAAACGGAUGGGAGUGCAGAUG	0.388889	0.388889	54	Avian	Mixed
;GU051988;HM060055	GGUCUGAAAGAUGAUCUUCUUGAAAAUUUGCAGGCCUAUCAGAAGCGAAUGGGAGUGCAAAUG	0.388889	0.388889	2	Avian	Mixed
;DQ095644;DQ095645;CY016796;FJ445235;AM911067;AM911068;GQ404563;GQ404561;CY020350	GGUCUGAGAGAUAAUCUUCUUGAAAAUUUGCAGGCUUACCAGAAACGAAUGGGAGUGCAGAUG	0.388889	0.388889	9	Avian	H5N1
;CY075926	GGUCUAAAGGAUGAUCUUCUUGAAAAUUUGCAGGCUUACCAGAAACGGAUGGGAGUGCAAAUG	0.388889	0.388889	1	Avian	H9N5
;GQ923182;CY076462;CY060181;EF597277	GGUCUGAAAGAUGAUCUUCUUGAAAAUUUGCAGGCUUACCAGAAACGGAUGGGAGUGCAAAUG	0.388889	0.388889	4	Avian	Mixed
;AY221536;AF509051;AF509047;AF509053;AF509054;AF509061;AF509055;AF509046;AF509059;AF509048;AF509056;AF509060;AF509045;AY221537	GGUUUGAAAGAUAAUCUUCUUGAAAAUUUGCAGGCCUACCAGAAACGAAUGGGAGUGCAAAUG	0.388889	0.388889	14	Avian	H5N1
;CY061816;CY004868;EU743072;AF073205;AY497129;GU186574;GU186545;CY015097;FJ610116;FJ610076;GU052764;FJ610109;FJ610088;FJ610064;FJ610070;FJ610058;GU052652;GU052597;GU052605;GU052589;EU743190	GGUUUAAAAGAUGAUCUUCUUGAAAAUUUGCAGGCCUACCAGAAACGGAUGGGAGUGCAAAUG	0.388889	0.388889	21	Avian	H5N2
;X13413;CY015109;GU052740;GU052772;CY015074;FJ610135;GU052756	GGUCUAAGAGAUGAUCUUCUUGAAAAUUUGCAGGCUUACCAGAAACGGAUGGGAGUGCAAAUG	0.388889	0.388889	7	Avian	H5N2
;EU743234;EU980474;FJ357092;GU052748	GGUCUAAGAGAUGAUCUUCUUGAAAAUUUGCAGGCUUACCAAAAACGGAUGGGAGUGCAAAUA	0.388889	0.388889	4	Avian	H5N2
;CY005732	GGUCUGAAAGAUGAUCUUCUUGAAAAUUUGCAGGCUUACCAGAAACGGAUGGGAGUGCAGAUG	0.388889	0.388889	1	Avian	H4N6
;GU052788;EU743059;FJ610122;GU052780;EU743053;FJ610128	GGUCUAAGAGAUGAUCUUCUUGAAAAUUUGCAGGCUUACCAGAAACGGAUGGGAGUGCAAAUA	0.388889	0.388889	6	Avian	H5N2
;GQ923206	GGUCUGAAAGAUGAUCUUCUUGAAAAUUUGCAGGCCUAUCAGAAGCGGAUGGGAGUGCAGAUG	0.388889	0.388889	1	Avian	H5N2
;EU871922	GGUCUGAAAGAUGAUCUUCUUGAAAAUUUGCAGACCUAUCAGAAACGGAUGGGAGUGCAGAUG	0.388889	0.388889	1	Avian	H5N7
;AY241599	GGUCUAAGAGAUGAUCUUCUUGAAAAUUUGCAGGCCUAUCAGAAACGGAUGGGAGUGCAAAUG	0.388889	0.388889	1	Avian	H7N2
;CY021350;CY022606	GGUCUAAAGGAUGAUCUUCUUGAAAAUUUGCAGGCCUAUCAGAAACGGAUGGGAGUGCAGAUG	0.388889	0.388889	2	Avian	H4N6
;CY078868;CY079779;CY079895;CY079771;CY080184;CY079855;CY045416;CY075934;HM144837;CY077442;AF523500;AJ621810;GQ227608;HM142742;DQ376669;GQ414925;GQ414927	GGUCUGAAAGAUGAUCUUCUUGAAAAUUUGCAGGCCUAUCAGAAACGGAUGGGAGUGCAAAUG	0.388889	0.388889	17	Avian	Mixed
;CY047649;GQ404606	GGUCUGAAAGAUGAUCUUCUUGAAAAUUUGCAGGCCUAUCAGAAACGAAUGGGAGUGCAGAUG	0.388889	0.388889	2	Avian	Mixed
;DQ320949;DQ320951;DQ320955;DQ320953;DQ320956;DQ320957;DQ320958	GGUCUGAGAGAUAAUCUUCUUGAAAAUUUGCAGGCCUAUCAGAAACGAAUGGGAGUGCAGAUG	0.388889	0.388889	7	Avian	H5N1
;AY241588	GGUCUAAAAGAUGAUCUUCUUGAAAAUUUGCAGGCCUAUCAGAAACGAAUGGGAGUGCAAAUG	0.388889	0.388889	1	Avian	H7N2
;CY005079;AY241591;EU742913;EU742905;AY241592;AY241589;AY241590;AY241594;AY241595;AY241603;AY241604;AY241606;AY300967;CY004300;AY300964	GGUCUAAAAGAUGAUCUUCUUGAAAAUUUGCAGGCCUAUCAGAAACGGAUGGGAGUGCAAAUG	0.388889	0.388889	15	Avian	H7N2
;EU676309	GGUCUGAGAGAUAAUCUUCUUGAAAAUUUGCAGGUCUACCAGAAACGAAUGGGAGUGCAGAUG	0.388889	0.388889	1	Avian	H5N1
;AY664420;CY004122;CY004736;CY004770;CY043327;CY004434;EU743395;EU743379;GU051018;GQ168613;HM060049;CY047489;CY047521;GU051937	GGUCUAAAAGAUGAUCUUCUUGAAAAUUUGCAGGCUUACCAGAAACGGAUGGGAGUGCAAAUG	0.388889	0.388889	14	Avian	Mixed
;CY004399;CY004406;CY005257;EU743403;EU743387;GU051002;GU051010;GU051056;CY004977;EU743355;GU050933;CY021166;CY021246;CY036035;GQ117130;CY047657;CY047673;GU049873;GU053352;FJ686723;GQ117138;GQ923430;GQ923422;GU049897;CY045296;GU051981;JF327329;JF327337;CY073713;GU049881;GQ923286;GU049889;CY047593;CY047601;CY081309;CY028236;CY033359;CY033391;CY039559;CY039615;CY076646;CY076654;CY076662;CY033415;CY…	GGUCUGAAAGAUGAUCUUCUUGAAAAUUUGCAGGCCUAUCAGAAACGGAUGGGAGUGCAGAUG	0.388889	0.388889	78	Avian	Mixed
;EF155007	GGCCUGAAAGAUGAUCUUAUUGACAAAUUGCAGGCAUACCAGAAACGGAUGGGGGUGCAGAUG	0.388889	0.324074	1	Avian	H9N2
;AF509057	GGUUUGAAAGAUAAUCUUCUUGAAAAUUUGCAGGCCUACCAGAAACGAAUGGGAGUGCAAAUA	0.388889	0.388889	1	Avian	H5N1
;GQ404584	GGUCUGAAAAAUGAUCUUCUUGAAAAUUUGCAGGCCUACCAGAAACGGAUGGGAGUGCAGAUG	0.388889	0.367284	1	Avian	H11N9
;EU532035	GGUCUGAAAGAUGAUCUUAUUGAAAAUUUGCAGGCCUACCAAAAACGGAUGGGAGUGCAAAUG	0.388889	0.367284	1	Avian	H9N2
;EF154982;EF154987;EU049989	GGUCUAAAAGAUGAUCUUAUUGAAAAUUUGCAGGCCUACCAGAAGCGGAUGGGAGUGCAAAUG	0.388889	0.367284	3	Avian	Mixed
;CY003908;CY004555	GGUCUAAAAGAUGAUCUUCUUGAAAAUCUGCAGGCAUACCAGAAACGGAUGGGAGUGCAAAUG	0.388889	0.345679	2	Avian	Mixed
;CY004568;CY005134;EU743136	GGUCUAAAAGAUGAUCUUCUUGAAAAUCUGCAGGCUUACCAGAAACGGAUGGGAGUGCAAAUG	0.388889	0.367284	3	Avian	Mixed
;DQ064400;DQ064401;DQ064403;DQ064404	GGUCUGAAAGAUGAUCUUAUUGAAAAUUUGCAGGCCUACCAGAAACGAAUGGGGGUGCAGAUG	0.388889	0.367284	4	Avian	H9N2
;CY022830;CY022846;CY024835;CY031756;CY031764;CY033298;CY034879;CY034887;CY035971;CY033290;CY024851;CY029850;CY031053;CY031061;CY031636;CY033194;CY033202;CY033210;CY034279;CY034287;CY034871;CY029858;CY031197;CY031772;CY034255;CY034319;CY034327;CY034783;CY034919;CY034831;CY024843;CY035963;CY034399;CY034815;CY037064;CY034823;EU743254;CY031205;CY031213;CY034263;CY034271	GGUCUAAGAGACGAUCUUCUUGAAAAUUUGCAGGCCUAUCAGAAAAGGAUGGGAGUGCAACUG	0.388889	0.367284	41	Avian	H7N2
;EU835748;EU835749;EU835750	GGCCUAAAAGAUGAUCUUAUUGAAAAUUUGCAGGCUUACCAGAAACGGAUGGGAGUGCAACUG	0.388889	0.345679	3	Avian	H9N2
;EU414522;GQ373121;EU532028;EU835747	GGCCUGAAGGAUGAUCUUAUUGAAAAUUUGCAGGCAUACCAGAAACGGAUGGGAGUGCAGAUG	0.388889	0.345679	4	Avian	H9N2
;DQ997552	GGUCUGAGAGAUGAUCUUAUUGAAAAUUUGCAGGCCUACCAGAAACGGAUGGGAGUGCAGAUG	0.388889	0.367284	1	Avian	H5N1
;CY021262;CY021270;CY021278;CY021454;CY021462;CY022742;CY024811	GGUCUAAAAGAUGAUCUUCUUGAAAAUUUACAGGCCUACCAGAAACGGAUGGGAGUGCAGAUG	0.388889	0.367284	7	Avian	H3N2
;DQ376662;DQ376660;DQ376684	GGUCUGAGAGAUGACCUUCUUGAAAAUUUGCAGGCAUACCAGAAACGGAUGGGAGUGCAAAUG	0.388889	0.367284	3	Avian	H6N1
;AF073190;CY078564;CY039781;CY077287;CY077334;CY078428;CY078476;CY078540;CY078556;CY078876;CY078676;CY078940;CY079020;CY043977;CY078956;CY045432;CY079559	GGUCUAAAAGAUGAUCUUCUUGAAAAUUUGCAGGCAUACCAGAAACGGAUGGGAGUGCAGAUG	0.388889	0.367284	17	Avian	H3N8
;AB256749;HM142741	GGCCUGAAAGAUGAUCUUAUUGAAAAUUUGCAGGCAUACCAGAAACGGAUGGGAGUGCAGAUG	0.388889	0.345679	2	Avian	Mixed
;GU051090	GGUCUGAAGAAUGAUCUUCUUGAAAAUUUGCAGGCCUACCAGAAACGGAUGGGAGUGCAGAUG	0.388889	0.367284	1	Avian	H11N6
;AB507259;DQ376680;DQ376683;DQ376689	GGUCUGAGAGAUGAUCUUCUUGAAAAUUUGCAGGCAUACCAGAAACGGAUGGGAGUGCAAAUG	0.388889	0.367284	4	Avian	Mixed
;AB507267	GGUCUGAGAGAUGAUCUUCUUGAAAAUUUGCAGGCAUACCAGAAGCGGAUGGGAGUGCAAAUG	0.388889	0.367284	1	Avian	H5N2
;AF156458;AF156459;AF156460;DQ064381;DQ064389;DQ064394;AB256685;AB256717;AB256709;DQ997456;HQ425337;EU532056;DQ997488;CY005525;AB256693;AB256669;EU532031;AY253755;DQ997436;DQ997194;EU365374;FJ384754;AF523493;AB256701;EU532032;AF222822;AF222823;CY005501;DQ997498;DQ997445	GGUCUGAAAGAUGAUCUUAUUGAAAAUUUGCAGGCCUACCAGAAACGGAUGGGGGUGCAGAUG	0.388889	0.367284	30	Avian	H9N2
;AF523496	GGUCUGAAAGAUGAUCUUCUUGAAAAUUUGCAAGCCUACCACAAACCGAUGGGAGUGCAAAUG	0.388889	0.367284	1	Avian	H9N2
;DQ376666	GGUCUGAGAGAUGAUCUUCUUGAAAAUUUACAGGCCUACCAGAAACGGAUGGGAGUGCAAAUG	0.388889	0.367284	1	Avian	H6N1
;AF523490;EF155020;EF155027;EF155023;DQ064386;DQ064384;AF523491;AY664696;DQ226099;DQ064388;DQ064383;DQ064399	GGCCUAAAAGAUGAUCUUAUUGAAAAUUUGCAGGCAUACCAGAAACGGAUGGGGGUGCAGAUG	0.388889	0.345679	12	Avian	H9N2
;EF124187	GGUCUGAGAGAUAACCUUCUUGAAAAUUUACAGGCCUACCAGAAACGAAUGGGAGUGCAGAUG	0.388889	0.367284	1	Avian	H5N1
;CY077653	GGUCUGAAAGAUGAUCUUCUUGAAAAUUUGCAGGCCUACCAGAAGCGAAUGGGAGUACAAAUG	0.388889	0.367284	1	Avian	H11N9
;DQ226104	GGCCUAAAAGAUGACCUUAUUGAAAAUUUGCAGGCAUACCAGAAACGGAUGGGGGUGCAGAUG	0.388889	0.345679	1	Avian	H9N2
;AJ416630;HM598307;CY077585;AF523486;AF523487;AF523488;CY005519;EF154988;AF523489;EF154984;FJ390064;AY700217;EF155036;EU050055;EU050058;EF155041;EU050030;EU050031	GGUCUGAAAGAUGAUCUUAUUGAAAAUUUGCAGGCCUACCAGAAACGGAUGGGAGUGCAAAUG	0.388889	0.367284	18	Avian	H9N2
;AY241608;AY241620;AY241622;AY241623;AY241624;AY241617;AY241614;EU742996;GU186486;EU742988;HQ541721;CY031093;CY031101;CY031109;CY031117;CY031125;CY031732;CY033234;CY033242;CY033250;CY033258;CY033266;CY036728;CY034391;CY031077;CY031245;CY031237;CY033218;CY034295;CY031724;CY033226;CY034303;CY034311;EU587373;EU743246;CY022766;CY031069;CY031229;CY031668;CY031684;CY031692;CY031700;CY031716;CY034847;CY…	GGUCUAAGAGAUGAUCUUCUUGAAAAUUUGCAGGCCUAUCAGAAAAGGAUGGGAGUGCAACUG	0.388889	0.367284	123	Avian	H7N2
;EF154981;EF154985;EF154996;EF155000;EF154999;EU049995;EU049997;EU049986;EF155009;EF154997;EF155010;EF155015;EF155011;EF155012;EF155014;EF155021;EF155022;EF155028;EF155029;EF155031;EF155033;EF155025;EF155032;EF155035;EF155034;EF154990;EF154995;EF154994;EU049987	GGUCUAAAAGAUGAUCUUAUUGAAAAUUUGCAGGCCUACCAGAAACGGAUGGGAGUGCAAAUG	0.388889	0.367284	29	Avian	H9N1
;AY575893;DQ835771;AY575894;DQ835772;AB212057;AY575895;GU052458;GU052495;AY676046;DQ835773;FJ784876;FJ784878;GU182162;EU676328;CY061297;CY061305	GGUCUGAGAGAUAAUCUUCUUGAAAAUUUGCAGGCAUACCAGAAACGAAUGGGAGUGCAGAUG	0.388889	0.367284	16	Avian	H5N1
;AF073192;CY004904;CY004912;GU052660;AF457678;AF457695;AF457710;AF474049;AF474052;AF474050;AF474051	GGUCUAAAAGAUGAUCUUCUUGAAAAUUUGCAGGCAUACCAGAAACGGAUGGGAGUGCAAAUG	0.388889	0.367284	11	Avian	H6N2
;GQ206309;GQ206307;GU970047;GU984798;HQ622812;GQ206308;HQ622811;HQ622813	GGCCUAAAAGAUGAUCUUAUUGAAAAUUUGCAGGCUUACCAGAAACGGAUGGGGUUGCAGAUG	0.388889	0.367284	8	Avian	H9N2
;CY028260;CY029890;CY034743;CY077633;CY079284;CY079292;CY080224;CY080232	GGUCUAAAAGAUGAUCUCCUUGAAAAUUUGCAGGCAUACCAGAAACGAAUGGGAGUGCAGAUG	0.388889	0.345679	8	Avian	H4N8
;DQ021739;GU051378;DQ021774;GU051219;CY015147;CY004444	GGUUUGAAAGAUGACCUCCUUGAAAAUUUGCAGGCCUACCAGAAGCGGAUGGGAGUGCAGAUG	0.388889	0.367284	6	Avian	Mixed
;CY005576;CY077686;CY077553;AB473546;EF597281;DQ376658	GGUCUGAAAGAUGAUCUUCUUGAAAAUUUGCAGGCAUACCAGAAACGGAUGGGAGUGCAAAUG	0.388889	0.367284	6	Avian	Mixed
;AY497135;GU186558;GU052629;GU052344;AB261856;GU050160	GGGCUAAGGGAUGAUCUUCUUGAAAAUUUGCAGGCCUAUCAGAAACGGAUGGGAGUGCAAAUG	0.388889	0.367284	6	Avian	H5N2
;DQ492935;CY034775;CY034231;CY017068;GU186657	GGUCUGAGAGAUAAUCUUCUUGAAAACUUGCAGGCCUACCAGAAACGAAUGGGAGUACAGAUG	0.388889	0.345679	5	Avian	H5N1
;CY022774;CY022782;CY024827;CY022790;CY022798	GGUCUAAGAGAUGAUCUUCUUGAAAAUUUGCAGGCCUAUCAGAAAAGGAUGGGAGUGCAAUUG	0.388889	0.367284	5	Avian	H7N2
;CY043929;CY045400;CY077111;CY077175;GU186518	GGUCUAAAAGAUGAUCUUCUCGAAAAUUUGCAGGCCUAUCAGAAACGGAUGGGAGUGCAGAUG	0.388889	0.367284	5	Avian	H5N1
;CY005699;CY035891;CY033154;CY005709;CY029874	GGUCUAAAGGAUGACCUUCUUGAAAAUUUGCAGGCAUACCAGAAACGAAUGGGAGUGCAGAUG	0.388889	0.367284	5	Avian	Mixed
;CY003864;CY014917;GQ404582;EU743419	GGUCUAAAAAAUGAUCUUCUUGAAAAUUUGCAGGCCUACCAGAAACGGAUGGGAGUGCAAAUG	0.388889	0.367284	4	Avian	Mixed
;DQ064390;HQ117889;DQ064391;DQ064393	GGUCUUAAAGAUGAUCUUAUUGAAAAUUUGCAGGCCUACCAGAAACGGAUGGGAGUGCAGAUG	0.388889	0.367284	4	Avian	H9N2
;AY497130;FJ610095;GU186539;GU052668	GGUCUAAGAGAUGAUCUUCUUGAAAAUUUACAGGCCUACCAGAAGCGGAUGGGAGUGCAAAUG	0.388889	0.367284	4	Avian	H5N2
;CY016412;CY041435;CY077143;GQ923526	GGUCUAAAAGAUGAUCUUCUUGAAAAUUUGCAGGCCUACCAGAAACGGAUGGGAGUACAGAUG	0.388889	0.367284	4	Avian	Mixed
;GU052846;CY053318;CY053870	GGUCUGAAAGAUGAUCUUCUUGAAAACUUGCAGGCCUAUCAGAAACGGAUGGGAGUGCAGAUG	0.388889	0.367284	3	Avian	Mixed
;DQ376668;DQ376670;DQ376674	GGUCUGAGAGAUGAUCUUCUUGAAAAUUUACAGGCCUACCAGAAAAGGAUGGGAGUGCAAAUG	0.388889	0.367284	3	Avian	H6N1
;CY004387;CY003895;CY004451	GGCUUGAAAGAUGACCUCCUUGAAAAUUUGCAGGCAUACCAGAAGCGGAUGGGAGUGCAGAUG	0.388889	0.345679	3	Avian	Mixed
;CY021366;CY024739;CY020590	CGUCUGAAAGAUGAUCUUCUUGAAAAUUUGCAGGCCUACCAGAAACGGAUGGGAGUGCAGAUG	0.388889	0.367284	3	Avian	H7N3
;AM157384;GQ404612;GQ404613	CGUCUGAAAGAUGAUCUUCUUGAAAAUUUGCAGGCCUACCAGAAACGGAUGGGAGUGCAAAUG	0.388889	0.367284	3	Avian	Mixed
;CY005704;CY028276	GGUCUAAAGGAUGAUCUUCUUGAAAAUUUGCAGGCAUACCAGAAACGAAUGGGAGUGCAGAUG	0.388889	0.367284	2	Avian	H3N8
;CY028492;CY034839	GGUCUAAGAGAUGAUCUCCUUGGAAAUUUGCAGGCCUAUCAGAAAAGGAUGGGAGUGCAAAUG	0.388889	0.367284	2	Avian	H7N2
;DQ064387;DQ997329	GGUCUGAAAGAUGAUCUUAUUGAAAAUUUGCAGGCCUACCAGAAACGGAUGGGAGUGCAGAUG	0.388889	0.367284	2	Avian	Mixed
;AB284991;AB285097	GGUCUGAAGGAUGAUCUUCUUGAAAACUUGCAGGCCUAUCAGAAACGAAUGGGAGUGCAAAUG	0.388889	0.367284	2	Avian	H13N6
;CY014946;CY014954	GGUCUGAAAGAUGAUCUUCUUGAAAAUUUACAGGCCUACCAGAAGCGGAUGGGAGUGCAAAUG	0.388889	0.367284	2	Avian	H6N8
;CY021422;CY021550	CGUCUAAAAGAUGAUCUUCUUGAAAAUUUGCAGGCCUACCAGAAACGGAUGGGAGUGCAAAUG	0.388889	0.367284	2	Avian	H7N1
;GU051365;GU051383	GGUCUAAAAGAUGAUCUUCUUGAAAACUUACAGGCCUACCAGAAACGGAUGGGAGUGCAGAUG	0.388889	0.345679	2	Avian	H6N4
;CY029898;CY028284	GGUCUGAAGGAUGACCUUCUUGAAAAUUUGCAGGCAUACCAGAAACGAAUGGGAGUGCAGAUG	0.388889	0.367284	2	Avian	H3N8
;CY043913;GU051683	GGUCUGAAGGAUGAUCUUCUUGAAAAUUUGCAGGCAUACCAGAAACGGAUGGGAGUGCAGAUG	0.388889	0.367284	2	Avian	Mixed
;CY031157;GU053136	GGUCUGAAAAAUGAUCUUCUUGAAAAUUUGCAGGCCUACCAGAAACGGAUGGGAGUGCAAAUG	0.388889	0.367284	2	Avian	Mixed
;DQ366317	GGUCUAAAAGAUGAUCUUAUUGAAAAUUUGCAGGCCUACCAAAAACGGAUGGGGGUGCAAAUG	0.388889	0.367284	1	Avian	H5N1
;GQ206306	GGCCUAAAAGAUGAUCUUAUUGAAAAUUUGCAGGCUUUCCAGAAACGGAUGGGGUUGCAGAUG	0.388889	0.367284	1	Avian	H9N2
;DQ064405	GGUCUGAAAGAUGAUCUUAUUGAAAAUUUGCAGGCCUACCAGAAACGGAUGGGGGUGCAAAUG	0.388889	0.367284	1	Avian	H9N2
;DQ997489	GGUCUGAAAGAUGAUCUUAUUGAAAAUUUGCAGGCCUACCAAAAACGGAUGGGGGUGCAGAUG	0.388889	0.367284	1	Avian	H9N2
;DQ997512	GGUCUGAAAGAUGAUCUUAUUGAAAAUUUGCAGGCCUACCUGAAACGGAUGGGGGUGCAGAUG	0.388889	0.345679	1	Avian	H9N2
;EU743079	GGUCUAAAAAAUGACCUUCUUGAAAAUUUGCAGGCCUACCAGAAACGAAUGGGAGUGCAAAUG	0.388889	0.367284	1	Avian	H5N2
;CY031644	GGUCUGAGAGACGAUCUUCUUGAAAAUUUGCAGGCCUAUCAGAAAAGGAUGGGAGUGCAACUG	0.388889	0.367284	1	Avian	H7N2
;AY724263	GGUCUGAAAAAUGAUCUUCUUGAAUAUUUGCAGGCCUACCAGAAGCGGAUGGGAGUGCAUAUG	0.388889	0.345679	1	Avian	H7N2
;DQ226101	GGCCUGAAAGAUGAUCUUAUUGAAAAUUUGCAGGCAUACCAAAAGCGGAUGGGGGUGCAGAUG	0.388889	0.345679	1	Avian	H9N2
;GQ404645	GGUCUGAAAGAUGACCUUCUUGAAAAUUUACAGGCCUACCAGAAACGGAUGGGAGUGCAAAUG	0.388889	0.367284	1	Avian	H3N8
;CY080580	GGUCUGAAAGAUGAUCUUCUUGAAAAUUUGCAGGCCUACCAGAAACGGAUGGGAGUACAAAUG	0.388889	0.367284	1	Avian	?
;DQ320966	GGUCUGAGAGAUAAUCUUCUUGAAAAUUUGCAGGCCUACCAGAAACGAAUGGGAGUACAGAUG	0.388889	0.367284	1	Avian	H5N1
;CY031652	GGUCUAAGGGAUGAUCUUCUUGAAAAUUUGCAGGCCUAUCAGAAAAGGAUGGGAGUGCAACUG	0.388889	0.367284	1	Avian	H7N2
;CY067705	GGUCUGAAAGAUGAUCUUCUUGAAAAUUUGCAGGCAUACCAGAAGCGAAUGGGAGUGCAAAUG	0.388889	0.367284	1	Avian	H6N8
;CY045248	GGUUUGAAAGAUGAUCUUCUUGAAAACUUGCAGGCCUACCAGAAACGGAUGGGAGUGCAAAUG	0.388889	0.367284	1	Avian	H4N2
;GU186603	GGUCUAAAAGAUGAUCUUCUUGAAAUUUUGCAGGCAUACCAGAAACGGAUGGGAGUGCAAAUG	0.388889	0.345679	1	Avian	H7N3
;GU051966	GGUCUAAAAGAUAAUCUUAUUGAAAAUUUGCAGGCCUACCAGAAACGGAUGGGAGUGCAAAUG	0.388889	0.367284	1	Avian	H5N9
;DQ366309	GGUCUAAAAGAUGAUCUUAUUGAAAAUUUGCAGGCCUACCAAAAACGGAUGGGGGUGCAGAUG	0.388889	0.367284	1	Avian	H5N1
;DQ226103	GGCCUAAAAGAUGACCUUAUUGAAAAUUUGCAGGCAUACCAGAAACGGAUGGGAGUGCAGAUG	0.388889	0.345679	1	Avian	H9N2
;DQ351860	GAUCUGAGAGAUAAUCUUCUUGAAAAUUUGCAGGCCUACCAGAACCGGAUGGGAGUGCAAAUG	0.388889	0.367284	1	Avian	H5N1
;DQ666926	GGUCUAAAGGAUGAUCUUCUUGAAAAUUUACAGGCCUACCAGAAACGGAUGGGAGUGCAAAUG	0.388889	0.367284	1	Avian	H5N1
;DQ226100	GGCCUAAGAGAUGAUCUUAUUGAAAAUUUGCAGGCAUACCAGAAACGGAUGGGGGUGCAGAUG	0.388889	0.345679	1	Avian	H9N2
;CY014405;CY014413;EF124057	GGUUUGAGAGAUAAUCUUCUUGAAAAUUUGCAGGCCUACCAGAAACGAAUGGGAGUGCAGAUG	0.388889	0.388889	3	Avian/Human	H5N1
;AF523492;DQ064385;DQ064398;AB256677;AB256733;DQ485211;DQ485227;AB256725;AB256741;CY005445;CY005463;CY005507;CY005513;EU081865;EU086238;CY075033;CY075041;CY075049;CY075057;EU502895;EU502903;DQ064395;DQ997473;EF070737;DQ064396;DQ226102;DQ226105;DQ485219	GGCCUGAAAGAUGAUCUUAUUGAAAAUUUGCAGGCAUACCAGAAACGGAUGGGGGUGCAGAUG	0.388889	0.345679	28	Avian/Swine	H9N2
;EU743218	GGUCUGAGAGAUAAUCUUCUUGAAAAUUUACAGGCCUACCAGAAGCGGAUGGGAGUGCAGAUG	0.388889	0.367284	1	Environment	H3N8
;CY028805	GGUUUGAAAGAUAAUCUUCUUGAAAAUUUGCAGGCCUACCAGAAACGGAUGGGAGUGCAAAUG	0.388889	0.388889	1	Equine	H3N8
;CY028813	GGUUUGAAAGAUGAUCUUCUUGAUAAUUUGCAGGCCUACCAGAAACGGAUGGGAGUGCAAAUG	0.388889	0.388889	1	Equine	H3N8
;CY032946	GGUUUGAAAGAUGAUCUUCUUGAAAAUUUGCAGGCCUACCAGAAACGAAUGGGAGUGCAAAUG	0.388889	0.388889	1	Equine	H3N8
;CY032938;CY032382	GGUUUGAAAGAUGAUCUUCUUGUAAAUUUGCAGGCCUACCAGAAACGGAUGGGAGUGCAAAUG	0.388889	0.388889	2	Equine	H3N8
;EU521582;CY036872;GQ404627;CY036880;CY036888;GQ404626	GGUCUGAAAGAUGACCUUCUCGAAAAUUUACAGGCCUACCAAAAGCGAAUGGGAGUGCAGAUG	0.388889	0.345679	6	Equine	Mixed
;M63529;CY030166;AF001681;CY032334;CY032358;CY032366;GQ404624;CY032342;CY032374;AF001682;AF001684;CY032350;CY030094;CY032414;CY032326;GQ404619;GQ404623;GQ404625;CY032318;GQ404628;GQ404629;GQ404615;FJ375237;CY030102;CY031539;GU052338;CY032954;CY030110;CY030118;CY030126;CY032230;AF001678;CY030134;AF001679;CY018870;CY030142;CY030158;BD244625;CY030174;BD244627;CY030182;FJ375235;CY032302;CY032310;FJ37…	GGUUUGAAAGAUGAUCUCCUUGAAAAUUUGCAGGCCUACCAGAAACGGAUGGGAGUGCAAAUG	0.388889	0.367284	56	Equine	H3N8
;EU794570;EU794554;EU794530	GGUUUGAAAGAUGAUCUCCUUGAAAAUUUGCAGGCCUACCAGAAACGGAUGGGAGUGCAACUG	0.388889	0.345679	3	Equine	H3N8
;CY036896	GGUCUGAAAGAUAACCUUCUCGAAAAUUUACAGGCCUACCAAAAGCGAAUGGGAGUGCAGAUG	0.388889	0.345679	1	Equine	H7N7
;EU794506	GGUUUGAAAGAUGAUCUCCUUGAAAAUUUGCAGGCCUACCAGAAACGGAUGGGAGUGCAAUUG	0.388889	0.345679	1	Equine	H3N8
;CY009613;CY077766	GGUCUGAAAGAUGAUCUUCUUGAAAAUUUGCAGGCCUAUCAAAAACGAAUGGGAGUGCAGAUG	0.388889	0.388889	2	Human	H1N1
;GQ385925	GGUCUAAGAGACGAUCUUCUUGAAAAUUUGCAGACCUAUCAGAAACGAAUGGGGGUGCAGAUG	0.388889	0.388889	1	Human	H3N2
;CY002753;CY008669;CY011289;CY016061	GGUCUAAAAGAUGAUCUUCUUGAAAAUUUGCAGACCUAUCAGAAACGGAUGGGGGUGCAGAUG	0.388889	0.388889	4	Human	H3N2
;CY002955;CY007572	GGUCUGAGAGAUGAUCUUCUUGAAAAUUUGCAGACCUAUCAGAAACGAAUGGGGGUGCAGAUG	0.388889	0.388889	2	Human	H3N2
;EU597921	GGUCUAAGAGAUGAUCUUCUUGAAAAUUUGCAGACCUAUCACAAACGAAUGGGGGUGCAGAUG	0.388889	0.388889	1	Human	H3N2
;EU598024;CY044805	GGUCUAAGAGAUGAUCUUCUUGAAAAUUUGCAGACCUAUCAGAAACGAAUGGGGGUGCAGAUA	0.388889	0.388889	2	Human	H3N2
;CY009117;CY017580;CY003185;CY003409	GGUCUAAGAGAUGAUCUUCUUGAAAAUUUGCAGACCUAUCAGAAGCGAAUGGGGGUGCAGAUG	0.388889	0.388889	4	Human	H3N2
;CY003609;CY011817;CY015909;CY017588;CY017958;CY020030;CY017596;CY019006;CY015933;CY016628;AF386771;AF386772;EU598013;CY074676;CY074916;CY069408;CY069448;CY008060;CY008100;CY008397;CY008349;CY008645;CY008613;CY008589;CY010085;CY018942;CY016604;CY008445;CY017822;CY014056;CY014096;CY016476;CY014104;CY014120;CY014128	GGUCUAAGAGAUGAUCUUCUUGAAAAUUUGCAGACCUAUCAGAAACGGAUGGGGGUGCAGAUG	0.388889	0.388889	35	Human	H3N2
;EU597908	GGUCUAAGAGAUGAUCUUCUUGACAAUUUGCAGACCUAUCAGAAACGAAUGGGGGUGCAGAUG	0.388889	0.388889	1	Human	H3N2
;K01140;DQ508828;CY020222;CY003489;CY006100;CY006204;CY006053;CY006756;CY006852;CY003353;CY010757;CY008725;CY008733;CY003505;CY003537;CY003745;CY006324;CY008709;CY008173;CY003721;CY006316;CY003737;CY035199;CY008741;CY035207;CY035215;CY006892;CY007620;CY007628;CY008469;CY008661;CY009053;CY003065;L18999;L18995;CY002089;CY008717;CY003521;CY008453;CY009069;DQ508852;CY003513;CY065969;CY065977;AF038271…	GGUCUAAAAGAUGAUCUUCUUGAAAAUUUGCAGACCUAUCAGAAACGAAUGGGGGUGCAGAUG	0.388889	0.388889	135	Human	H3N2
;CY000474;AB441997;CY014112;CY024920;CY024921;CY025836;CY025908;CY030198;CY030206;AB441996;FJ912947;FJ912959;FJ912965;FJ912971;CY031820;CY025860;CY026196;CY031564;CY025748;CY031806;EU598146;CY031808;AB441998;EU716493;EU716499	GGUCUAAGAGAUGAUCUUCUUGAAAAUUUGCAGACCUAUCAAAAACGAAUGGGGGUGCAGAUG	0.388889	0.388889	25	Human	H3N2
;CY077728	GGUCUGAAAGAUGAUCUUCUUGAAAAUUUGCAGGCCUAUCAAAAACGAAUGGGGGUGCAGAUG	0.388889	0.388889	1	Human	H1N1
;U65569;U65567;U65570;U65571;U65572;U65575;CY017300;U65576;U65574;U65578;U65565;U65568;CY002273;CY011841;CY012505;CY013320;CY013312	GGUCUAAAAGAUGAUCUUCUUGAAAAUUUGCAGACCUAUCAGAAACGAAUGGGAGUGCAGAUG	0.388889	0.388889	17	Human	H3N2
;CY012921	GGUCUAAGAGAUGAUCUUCUUGAAAAUUUGCAGACCUAUCAGAAACGAAUGGGGGUGCAAAUG	0.388889	0.388889	1	Human	H3N2
;CY003561	GGUCUAAGAGAUGAUCUUCUUGAAAAUUUGCAGGCCUAUCAGAAACGAAUGGGGGUGCAGAUG	0.388889	0.388889	1	Human	H3N2
;CY068202	GGUCUAAGAGAUGAUCUUCUUGAAAAUUUGCAGACCUAUCAGAAACAAAUGGGGGUGCAGAUG	0.388889	0.388889	1	Human	H3N2
;AF038273;AF225526;AF225528;CY010797;CY011265;CY012209;CY009501;CY009661;CY009725;CY009749;CY010029;CY010053;CY009493;CY015517;CY009709;CY010613;CY011425;CY012849;CY011257;AF225529;AF038274;EU597891;CY036848;CY010637;CY010645;CY010693;CY010621;CY010685;CY009733;CY009485;CY010061;AF225527;AF400770;AF400772;EU597885;EU597889;EU597918;CY001993;EU597914;EU597910;EU597911;EU597922;EU597923;EU597913;EU…	GGUCUAAGAGAUGAUCUUCUUGAAAAUUUGCAGACCUAUCAGAAACGAAUGGGGGUGCAGAUG	0.388889	0.388889	2191	Human	H3N2
;CY038680	GGUCUAAGAGAUGAUCUUCUUGAAAAUUUGCAGACCUAUCAGAAACGAAUGGGUGUGCAGAUG	0.388889	0.388889	1	Human	H3N2
;HQ606474	GGUUUGAAAGAUGACCUUCUUGAAAAUUUGCAGGCCUACCAGAAGCGAAUGGGAGUGCAGAUG	0.388889	0.388889	1	Human	H1N1
;AJ458339	GGUCUAAAAGAUGAUCUUCUUGAAAAUUUGCAGACCUAUCAGAAGCGAAUGGGGGUGCAGAUG	0.388889	0.388889	1	Human	H3N2
;CY006828;AY210264	GGUCUAAAAGAUGAUCUUCUUGAAAAUUUGCAGGCCUAUCAGAAAAGAAUGGGGGUGCAGAUG	0.388889	0.388889	2	Human	H3N2
;CY077795;CY077836	GGUCUAAAAGAUGAUCUUCUUGAAAAUUUGCAGGCCUAUCAGAAGCGAAUGGGGGUGCAAAUG	0.388889	0.388889	2	Human	H3N2
;CY025486	GGUCUAAGAGAUGAUCUUCUUGAAAAUUUGCAGACCUAUCAAAAACGAAUGGGAGUGCAGAUG	0.388889	0.388889	1	Human	H3N2
;CY012569	GGUCUAAAAGAUGAUCUUCUUGAAAAUUUGCAGACCUAUCAGAAACGAAUGGGGUUGCAGAUG	0.388889	0.388889	1	Human	H3N2
;CY006045	GGUCUAAAAGAUGAUCUUCUUGAAAAUUUGCAGGCCUAUCAGAAGCGAAUGGGAGUGCAGAUG	0.388889	0.388889	1	Human	H3N2
;CY044270	GGUCUAAAAGAUAAUCUUCUUGAAAAUUUGCAGGCCUAUCAGAAACGAAUGGGGGUGCAGAUG	0.388889	0.388889	1	Human	H3N2
;CY019948;CY019972;X08091;CY021822;CY021902;CY022094;CY077892;CY022022;CY077751;CY077774;CY032270;CY077714;AY210029;CY009277;CY009453;CY021710;CY077759;CY077884;CY020286;CY020470;M63517	GGUCUGAAAGAUGAUCUUCUUGAAAAUUUGCAGGCCUAUCAGAAACGAAUGGGGGUGCAGAUG	0.388889	0.388889	21	Human	H1N1
;X08093;AY210030;DQ009919;CY014977;CY020382;CY021070;CY021790;CY034045;CY034053;CY034061;CY034069;CY034077;CY077900;CY077743;AY210027;AY210031;CY031580;CY045805;CY044326;CY032254;CY020318;CY021814;CY022014;CY020374;CY021014;CY021806;CY031604;AY210026;DQ508844;AY210028;AX399730;AY210032;AY210033;AY210034;CY020542;CY021934;CY077907;CY077789;AY210039;AY210035;AY210036;X59240;M63515;AF348188;CY033002…	GGUCUAAAAGAUGAUCUUCUUGAAAAUUUGCAGGCCUAUCAGAAACGAAUGGGGGUGCAGAUG	0.388889	0.388889	216	Human	H3N2
;GQ369872;GQ895039	GGUCUAAGAGAUGAUCUUCUUGAAAAUUUGCAGACCUAUCARAAACGAAUGGGGGUGCAGAUG	0.388889	0.388889	2	Human	H3N2
;M63516;DQ849011	GGUCUAAAAGAUGAUCUUCUUGAAAAUUUGCAGACCUAUCAGAAACGAAUGGGGGUGCAGGUG	0.388889	0.388889	2	Human	H3N2
;U65561;CY003713	GGUCUAAAGGAUGAUCUUCUUGAAAAUUUGCAGACCUAUCAGAAACGAAUGGGGGUGCAGAUG	0.388889	0.388889	2	Human	H3N2
;CY036992	GGUCUAAGAGAUGACCUUCUUGAAAAUUUGCAGACCUAUCAGAAACGAAUGGGGGUGCAGAUG	0.388889	0.388889	1	Human	H3N2
;CY045757;CY078468	GGUCUAAAAGAUGAUCUUCUUGAAAAUUUGCAGGCCUAUCAGAAACGAAUGGGAGUGCAGAUG	0.388889	0.388889	2	Human	Mixed
;CY012145;CY012737;CY013169	GGUCUAAAAGACGAUCUUCUUGAAAAUUUGCAGACCUAUCAGAAACGAAUGGGGGUGCAGAUG	0.388889	0.388889	3	Human	H3N2
;CY045773	GGUCUGAAAGAUGAUCUUCUUGAAAAUUUGCAGGCCUAUCAGAAACGAAUGGGGGUGCAGAUA	0.388889	0.388889	1	Human	H1N1
;CY012465;CY001430	GGUCUAAGAGAUGAUCUUCUUGAAAAUUUGCAGACCUAUCAGAGACGAAUGGGGGUGCAGAUG	0.388889	0.388889	2	Human	H3N2
;EU597992	GGUCUAAGAGAUGAUCUUCUUGAUAAUUUGCAGACCUAUCAGAAACGAAUGGGGGUGCAGAUG	0.388889	0.388889	1	Human	H3N2
;HQ664934	GGUCUAAGAGGUGAUCUUCUUGAAAAUUUGCAGACCUAUCAGAAACGAAUGGGGGUGCAGAUG	0.388889	0.388889	1	Human	H3N2
;EU597924;CY006476;CY006500;CY009685;CY009469;CY009477;CY009509;CY009517;CY009525;CY009669;CY009677;CY009693;CY010045;CY010589;EU597888;CY009741;CY010037;CY010069;CY011129;CY009461;CY009653;CY009717;AJ458307;AJ458308;EU598067;AB281264;EU716448;EU716523;GQ385868;CY068759;CY070968;HQ214357;AB281207;CY038624;EU598110;EU598116;DQ849006	GGUCUAAGAGAUGAUCUUCUUGAAAAUUUGCAGACCUAUCAGAAACGAAUGGGAGUGCAGAUG	0.388889	0.388889	37	Human	H3N2
;CY002809;CY003385	GGUCUGAAAAAUGAUCUCCUUGAAAAUUUGCAGGCCUACCAGAAACGAAUGGGGGUGCAGAUG	0.388889	0.345679	2	Human	H1N1
;AY130766	GGUCUGAAAGACGAUCUUAUUGAAAAUUUGCAGGCCUACCAGAAACGAAUGGGGGUGCAGAUG	0.388889	0.367284	1	Human	H1N1
;GQ369831	GGUCUAAGAGAUGAUCUUCUUGAAAAUUUGCAGACCUAUCAGAAACGAAAGGGGGUGCAGAUG	0.388889	0.367284	1	Human	H3N2
;GQ255899;GQ329094;CY041963;CY041986;CY043105;CY043113;CY049910;CY049918;CY049942;CY049950;CY049958;CY049966;CY049974;CY049982;CY073052;CY073059;CY083019;CY083027;CY083035;CY083163;CY056748;CY061931;CY072231;CY073734;CY073774;GQ377094;CY043089;GQ457515;GQ894854;GQ894879;CY049823;CY049846;CY049878;CY073067;CY083043;CY083482;CY056141;CY062235;CY063068;CY063164;CY066232;CY066776;CY062684;CY057311;CY…	GGUCUGAAAGAUGACCUUCUUGAAAAUUUGCAGGCAUACCAGAAGCGAAUGGGAGUGCAGAUG	0.388889	0.367284	58	Human	H1N1
;CY014215;CY014314;CY014369;CY014385;EU146802;CY014506;CY014514;CY014445;CY014461;CY014226;CY014220;EU146706;CY014216;CY014217;CY014218;EU146714;EU146690;EU146683;CY014219;CY014221;CY014397;CY017673;CY017681;CY014532;CY014546;CY017657;CY014485;CY014493;EU146778;CY014453;CY014377;CY017665;CY014501;CY017641;CY017649;CY017691;CY019355;CY019363;CY019379;CY019371;GQ122494	GGUCUGAGAGAUAAUCUUCUUGAAAAUUUACAGGCCUACCAGAAACGAAUGGGAGUGCAAAUG	0.388889	0.367284	41	Human	H5N1
;AB433826;AB433830;CY040155;CY084234	GGUCUGAAAGAUGAUCUCCUUGAAAAUUUGCAGGCCUAUCAGAAACGAAUGGGGGUGCAGAUG	0.388889	0.367284	4	Human	H1N1
;CY019411;CY019419;CY019427;CY019435	GGUCUGAGAGAUAAUCUUCUUGAAAAUUUACAGGCCUACCAGAAACGAAUGGGAGUGCAGAUG	0.388889	0.367284	4	Human	H5N1
;HQ214342;CY044493;HQ214343	GGUCUAAGAGAUGAUCUUCUUGAAAAAUUGCAGACCUAUCAGAAACGAAUGGGGGUGCAGAUG	0.388889	0.367284	3	Human	H3N2
;AJ458305;CY038552;CY038560	GGCCUAAGAGAUGAUCUUCUUGAAAAUUUGCAGACCUAUCAGAAACGAAUGGGGGUGCAGAUG	0.388889	0.367284	3	Human	H3N2
;CY019387;CY019395;CY019403	GGUCUGAGAGAUAAUCUUCUUGAUAAUUUACAGGCCUACCAGAAACGAAUGGGAGUGCAAAUG	0.388889	0.367284	3	Human	H5N1
;AB433839;AB441990	GGACUAAGAGAUGAUCUUCUUGAAAAUUUGCAGACCUAUCAGAAACGAAUGGGGGUGCAGAUG	0.388889	0.367284	2	Human	H3N2
;AM157375;GU052276	GGUAUGAAAGAUGAUCUUCUUGAAAAUUUGCAGGCCUACCAGAAACGGAUGGGAGUGCAAAUG	0.388889	0.367284	2	Human	H3N2
;AY210062;AY210266	GGUCUAAAAGAUGAUCUUCUUGAAAACUUGCAGGCCUAUCAGAAACGAAUGGGGGUGCAGAUG	0.388889	0.367284	2	Human	H3N2
;EF620903	GGUCUGAAAGAUGAUCUUCUUGAAAAUUUACAGGCCUACCAGAGACGGAUGGGAGUGCAAAUG	0.388889	0.367284	1	Human	H9N2
;CY001785	GGUCUAAGAGAUGAUCUUCUUGAAAACUUGCAGGCCUAUCAGAAACGAAUGGGGGUGCAGAUG	0.388889	0.367284	1	Human	H3N2
;CY063639	GGUCUGAAAGAUGACCUUCUUGAAAAUUUGCAGGCCUACCAGAAGCGAAUGGGAGUACAGAUG	0.388889	0.367284	1	Human	H1N1
;CY015677	GGCCUAAGAGAUGAUCUUCUUGAAAAUUUGCAGACCUAUCAGAAGCGAAUGGGGGUGCAGAUG	0.388889	0.367284	1	Human	H3N2
;CY006220	GGUCUAAAAGAUGAUCUUCUCGAAAAUUUGCAGGCCUAUCAAAAACGAAUGGGGGUGCAGAUG	0.388889	0.367284	1	Human	H3N2
;CY006588	GGUCUAAGAGAUGAUCUUCUUGAAAACUUGCAGACCUAUCAGAAACGAAUGGGAGUGCAGAUG	0.388889	0.367284	1	Human	H3N2
;CY003545	GGUCUAAAAGAUGAUCUUCUUGAAAAAUUGCAGACCUAUCAGAAACGAAUGGGGGUGCAGAUG	0.388889	0.367284	1	Human	H3N2
;CY018926	GGUCUAAGAGAUGAUCUCCUUGAAAAUUUGCAGACCUAUCAGAAACGAAUGGGGGUGCAGAUG	0.388889	0.367284	1	Human	H3N2
;CY064816	GGUCUAAGAGAUGAUCUUCUUGAAAAUUURCAGACCUAUCAGAAACGAAUGGGGGUGCAGAUG	0.352941	0.352941	1	Human	H3N2
;HM219632;CY081064	GGUCUGAAAGAUGACCUUCUUGAAAAUUUGCAGGCCUAUCAGAAGCGAAUGGGAGUGCAGAUG	0.388889	0.388889	2	Human/Swine	H1N1
;CY020518;CY002497;GU086116;CY022270;CY022342;CY022398;CY028188;CY036800	GGUCUAAAAGAUGAUCUUCUUGAAAAUUUGCAGGCCUAUCAAAAACGAAUGGGGGUGCAGAUG	0.388889	0.388889	8	Human/Swine	H1N1
;AY210037;AY210038;AY210040;CY003729;CY006836;CY008701;CY009061;CY006724;CY006884;CY022310;CY021830;CY021942;CY006732;CY006740;CY006844;CY007612;CY008116;CY008124;AF251391;FJ830858;CY009301;EU273778;M63532;CY009917;GU086132;GU086148;GQ422390;GQ422391;GQ422392;GQ422393;GQ422394;GU086140;GQ422395;GU086124;CY022278;GU086156;CY024951;CY026468;CY022062;CY022414;GQ404593;AB434411	GGUCUAAAAGAUGAUCUUCUUGAAAAUUUGCAGGCCUAUCAGAAGCGAAUGGGGGUGCAGAUG	0.388889	0.388889	42	Human/Swine	Mixed
;CY011801;M33045	GGUCUGAAAAAUGAUCUUCUUGAAAAUUUGCAGGCCUACCAGAAACGAAUGGGGGUGCAGAUG	0.388889	0.367284	2	Human/Swine	H1N1
;EU500847;CY079373;CY079381;CY079765;CY079972;CY080011;CY080147;M63540;CY032390;AF001680;AF001675;CY028797;CY032406;CY033482;CY028845;CY028853;CY028901;CY030744;CY028861;CY028869;CY028877;CY028885;CY028893;CY028909;CY030086;AF001676;CY028821;CY028829;CY030078;CY028917;CY030190;GQ404578;CY032422;CY034935;M55476;CY076969;AF250487	GGUUUGAAAGAUGAUCUUCUUGAAAAUUUGCAGGCCUACCAGAAACGGAUGGGAGUGCAAAUG	0.388889	0.388889	37	Mixed	Mixed
;GU050548	GGUCUAAAAGAUGAUCUUCUUGAAAAUCUGCAGGCCUAUCAGAAACGGAUGGGAAUGCAAAUG	0.388889	0.367284	1	Seal	H7N7
;CY022438;CY026300;GQ404588;CY026284	GGUCUGAAAGAUGAUCUUCUUGAAAAUUUGCAGGCCUAUCAGAAGCGAAUGGGGGUGCAGAUG	0.388889	0.388889	4	Swine	H1N1
;CY085697;CY085713;CY085721;CY085753	GGUCUGAAAGAUGACCUUCUUGAAAAUUUGCAGGCUUACCAGAAACGGAUGGGAGUGCAGAUA	0.388889	0.388889	4	Swine	H1N1
;GU086108	GGUCUAAAAGAUGAUCUUCUUGAAAAUUUGCAGGCCUAUCAAAAACGAAUGGGGGUGCAAAUG	0.388889	0.388889	1	Swine	H3N2
;CY026292	GGUCUGAAAGAUGAUCUUCUUGAAAAUUUGCAGGCCUAUCAGAAGCGAAUGGGAGUGCAGAUG	0.388889	0.388889	1	Swine	H1N1
;CY022478	GGUCUAAAAGAUGAUCUUCUUGAAAAUUUGCAGGCCUAUCAGAAACGAAUGGGGGUGCAAAUG	0.388889	0.388889	1	Swine	H1N1
;EF101750;AB434307;AB434315;AB434323;AB434331;AB514942;CY086962	GGUCUGAAAGAUGACCUUCUUGAAAAUUUGCAGGCUUACCAAAAACGGAUGGGAGUGCAGAUA	0.388889	0.388889	7	Swine	H1N1
;AB434291	GGUUUGAAAGAUGACCUUCUUGAAAAUUUGCAGGCCUACCAGAAACGGAUGGGAGUGCAGAUU	0.388889	0.388889	1	Swine	H1N1
;GQ404587	GGUCUGAAAGAUGAUCUUCUUGAAAAUUUGCAGGCCUAUCAAAAGCGAAUGGGGGUGCAGAUG	0.388889	0.388889	1	Swine	H1N1
;CY062295	GGUUUGAAAGAUGACCUUCUUGAAAAUUUGCAGGCCUACCAGAAGCGGAUGGGAGUGCAGAUA	0.388889	0.388889	1	Swine	H1N1
;FN429083	GGUCUGAAAGAUGACCUUCUUGAAAAUUUGCAGGCCUAUCAGAAACGGAUGGGAGUGCAAAUA	0.388889	0.388889	1	Swine	H1N1
;GQ229271	GGUCUGAAAGAUGACCUUCUUGAAAAUUUGCAGGCCUAUCAGAAACGGAUGGGAGUGCAGAUG	0.388889	0.388889	1	Swine	H1N2
;CY085865	GGUUUGAAAGAUGACCUUCUUGAAAAUUUGCAGGCCUACCAGAAGCGGAUGGGAGUGCAAAUA	0.388889	0.388889	1	Swine	H1N2
;CY077930	GGUCUAAAAGAUGAUCUUCUUGAAAAUUUGCAGGCCUAUCAGAAGCGGAUGGGGGUGCAGAUG	0.388889	0.388889	1	Swine	H3N2
;GU593047	GGUCUGAAAGAUGACCUUCUUGAAAAUUUGCAGGCCUACCAGAAGCGAAUGGGAGUCCCGACG	0.388889	0.324074	1	Swine	H1N1
;EU478830	GGUCUGAAAGAUGACCUUCUUGAAAAUUUGCAGGUCUACCAGAAACGGAUGGGAGUGCAGAUA	0.388889	0.388889	1	Swine	H1N1
;EU478802;CY061824;CY009893	GGUUUGAAAGAUGACCUUCUUGAAAAUUUGCAGGCCUACCAGAAACGGAUGGGAGUGCAGAUA	0.388889	0.388889	3	Swine	Mixed
;CY086891;CY086899;CY086907	GGUCUGAAAGAUGACCUUCUUGAAAAUUUGCAGGUCUACCAGAAGCGAAUGGGAGUGCAGAUG	0.388889	0.388889	3	Swine	H1N2
;AB434355	GGUUUGAAAGAUGACCUUCUUGAAAAUUUGCAGGCCUACCAGAAACGAAUGGGAGUGCAGAUA	0.388889	0.388889	1	Swine	H3N2
;CY045554	GGUCUAAAAGAUGAUCUUCUUGAAAAUUUACAGGCCUACCAGAAGCGGAUGGGAGUGCAAAUG	0.388889	0.367284	1	Swine	H3N2
;EU478811	GGUCUGAAAGAUGACCUUCUUGAAAAUUUGCAGGCAUACCAGAAACGGAUGGGAGUGCAGAUA	0.388889	0.367284	1	Swine	H1N1
;M55478;GQ404621	GGUCUGAAAGAUGAUCUUCUUGAAAAUUUACAGGCCUACCAGAAACGGAUGGGGGUGCAGAUG	0.388889	0.367284	2	Swine	H1N1
;EU478808	GGUCUGAAAGAUGACCUUCUUGAAAAUUUACAGGCCUACCAGAAGCGGAUGGGAGUGCAAAUA	0.388889	0.367284	1	Swine	H3N2
;DQ666934	GGUCUAAAAGAUGAUCUUCUUGAUAAUUUACAGGCCUACCAGAAACGGAUGGGAGUGCAAAUG	0.388889	0.367284	1	Swine	H1N2
;AB434363;CY010565;EU478828;EU478841	GGUCUGAAAGAUGACCUUCUUGAAAAUUUACAGGCCUACCAGAAACGGAUGGGAGUGCAGAUA	0.388889	0.367284	4	Swine	H3N2
;EU053136;EU478809;EU478827;EU478810;EU478812;EU478813;EU478816;EU478819;EU478832;EU478842;EU478815;EU478818;EU478822;EU478829;GQ161122;GQ161131	GGUCUGAAAGAUGACCUUCUUGAAAAUUUGCAGGCAUACCAGAAACGGAUGGGAGUGCAAAUA	0.388889	0.367284	16	Swine	H1N2
;EU697207;EU743211;CY045578;CY045522;CY045602;CY045626;CY045634;CY045642;CY045610;CY045618;CY045650;CY045658;CY045666;CY045682;CY045698;CY045674;CY045690;CY045706;CY045546;CY045594;CY045714;CY045530;CY045538;HQ424899;CY045562;HQ424890;HM125985;HM461845;JF316646;HQ734211;HQ734217;HQ734223;HQ734229;HQ378740;GQ149509;CY004984;CY004940;CY017750;CY081278;EU735835	GGUCUAAAAGAUGAUCUUCUUGAAAAUUUACAGGCCUACCAGAAACGGAUGGGAGUGCAAAUG	0.388889	0.367284	40	Swine	Mixed
;HQ734194;HQ734206;JF312080;JF312081;HQ734197;HQ734200;HQ734203	GGUCUAAAAGAUGAUCUUCUUGAAAAUUUACAGGCCUACCAAAAACGGAUGGGAGUGCAAAUG	0.388889	0.367284	7	Swine	H3N2
;CY085409;CY085425;CY085473;CY085481;CY087131	GGUCUAAAAGACGAUCUUCUUGAAAAUUUACAGGCCUACCAGAAACGAAUGGGGGUGCAAAUG	0.388889	0.367284	5	Swine	H1N1
;EU516306;DQ997420;DQ997425	GGUCUGAGAGAUGAUCUUAUUGAAAAUUUGCAGGCCUACCAGAAACGGAUGGGGGUGCAGAUG	0.388889	0.367284	3	Swine	H9N2
;CY085521;CY085577;CY085585	GGUCUAAAAGACGAUCUUCUUGAAAAUUUACAGGCCUACCAGAAGCGAAUGGGGGUGCAAAUG	0.388889	0.367284	3	Swine	H1N2
;CY085321	GGCUUAAAGGAUGAUCUUCUUGAAAAUUUACAGGCCUACCAGAAGCGAAUGGGGGUGCAAAUG	0.388889	0.367284	1	Swine	H1N1
;EU478825	GGUCUGAAAGAUGAUCUUCUUGAAAAUUUGCAGGCAUACCAGAAACGGAUGGGAGUGCAAAUA	0.388889	0.367284	1	Swine	H1N2
;CY084812	GGCCUAAAAGAUGAUCUUCUUGAAAAUUUACAGGCCUAUCAGAAGCGAAUGGGGGUGCAGAUG	0.388889	0.367284	1	Swine	H1N1
;EU053144	GGUCUGAAAGAUGACCUUCUUGAAAAUUUGCAGGCAUACCAGAAAAGGAUGGGAGUGCAAAUA	0.388889	0.367284	1	Swine	H1N2
;GQ907295;GQ907303	GGUCUAAAAGAUGAUCUUCUUGAAAAUUUGCAGGCCUAUCAGAAGCGGAUGGGAGUGCAGAUG	0.388889	0.388889	2	Swine/Avian	Mixed
;GU052246	GGUCUGAAAGAUGAUCUUCUUGAAAAUUUACAGGCCUAUCAGAAACGGAUGGGAGUGCAAAUG	0.333333	0.314815	1	Avian	H13N6
;FJ577543;HM346510;GU050280	GGUCUAAAAGAUGAUCUUAUUGAAAAUUUGCAGGCUUACCAGAAACGGAUGGGAUUGCAGAUG	0.333333	0.314815	3	Avian	Mixed(H9N2)
;EF492259	GGUCUAAAAGAUGAUCUUAUUGAAAAUUUGCAGGCUUACCAGAAACGAAUGGGGUUGCAGAUG	0.333333	0.314815	1	Avian	H9N2
;AB049165;AB049166;GQ206302;GQ206303;GU984797;GQ206305;GQ206304;FJ464596;FJ464610;FJ464611;FJ464598;FJ464602;FJ464603;FJ464604;FJ464612;GQ148821;GQ148822;FJ464599;FJ464600;FJ464601;FJ464609;GQ148824;FJ464608;GQ148823;GQ148828;FJ464605;FJ464607;GQ148832;GQ148825;GQ148830;GQ148820;GQ148831;GQ148827;FJ464606;CY038429;CY038453;CY038461;CY038469;CY038477;EF063509	GGUCUAAAAGAUGAUCUUAUUGAAAAUUUGCAGGCUUACCAGAAACGGAUGGGGUUGCAGAUG	0.333333	0.314815	40	Avian	Mixed(H9N2/H5N1)
;HM172123	GGUGUGAGAGAUAAUCUUCUUGAAAAUUUGCAGGCCUAUCAGAAACGAAUGGGAGUGCAGAUG	0.333333	0.314815	1	Avian	H5N1
;GQ148829	GGUCUAAAAGAUGAUCUUAUUGAAAAUUUGCAGGCUUACCACAAACGGAUGGGGUUGCAGAUG	0.333333	0.314815	1	Avian	H9N2
;FJ384746	GGUUUGAAAGAUGAUCUUAUUGAAAAUUUGCAGGCCUACCAGAAACGGAUGGGGGUGCAGAUG	0.333333	0.314815	1	Avian	H9N2
;CY038397;CY038437;CY038485;HM370050;HM370057	GGUCUAAAAGAUGAUCUUAUUGAAAAUUUGCAGGCUUACCAGAAACGGAUGGGGUUGCAAAUG	0.333333	0.314815	5	Avian	H9N2
;EU050014	GGUCUAAGAGAUGAUCUUAUUGAAAAUUUGCAGGCUUACCAGAAACGGAUGGGAGUGCAGAUG	0.333333	0.314815	1	Avian	H6N1
;EF492244;EF492272;EF492246;EF492262;EF492265;EF492263;EF492264;EF492266;EF492248;EF492249;EF492260;EF492252;EF492255;EF492253;EF492254;EF492256;FJ464597;GQ148833;GQ148826	GGUCUAAAAGACGAUCUUAUUGAAAAUUUGCAGGCUUACCAGAAACGAAUGGGGUUGCAGAUG	0.333333	0.314815	19	Avian	H9N2
;AJ410569;AJ410570	GGUCUAAAAGAUGAUCUUAUUGAAAAUUUGCAGGCUUACCAAAAACGGAUGGGGGUGCAGAUG	0.333333	0.314815	2	Avian	H6N1
;AJ427311;AF523482;AF523485;EF154980;HM144780;AF523483;AB586846;EF154983;AF523484;EU049994;AY651401;EF155004;EF155005;EF155006;EF155008;EU050003;EF154998;EU050007;EF155001;EU049999;EU050000;EU050002;EU050004;EU050005;EU050006;EF155002;EF154992;EF154993;EU049996;EF155017;EF155013;EU050015;EF155016;AB586862;AB586878;AB586886;AB586870;DQ226096;EF155024;EF155030;EU050020;DQ226097;EU050021;EU050026;EU…	GGUCUAAAAGAUGAUCUUAUUGAAAAUUUGCAGGCUUACCAGAAACGGAUGGGAGUGCAGAUG	0.333333	0.314815	64	Avian	Mixed(H9N2/H6N1)
;GU064952	GGUCUAAAAGAUGAUCUUAUUGAAAAUUUGCAGGCUUACCAGAAACGGAUGGGUUUGCAAAUG	0.333333	0.314815	1	Avian	H9N2
;EF492247;EF492251;EF492250	GGUCUAAAAGACGAUCUUAUUGAAAAUUUGCAGGCUUACCAGAAACGCAUGGGGUUGCAGAUG	0.333333	0.314815	3	Avian	H9N2
;AF250482;AJ410568;AF255363;AJ278646;AJ278647;AJ410571;AJ410572;EU049990;EU049991;AB586854;EU049992;AJ410574;AF255364;AJ410573;AB586790	GGUCUAAAAGAUGAUCUUAUUGAAAAUUUGCAGGCUUACCAGAAACGGAUGGGAGUGCAAAUG	0.333333	0.314815	15	Avian	Mixed (H9N2/H6N4)
;EF063506;EF063507;EF063508;CY076726	GGUCUAAAAGAUGAUCUUAUUGAAAAUUUGCAGGCUUACCAAAAACGGAUGGGGUUGCAGAUG	0.333333	0.314815	4	Avian	H9N2
;EF154989	GGCCUAAAAGAUGAUCUUAUUGAAAAUUUACAGGCAUACCAGAAACGGAUGGGGGUGCAGAUG	0.333333	0.277778	1	Avian	H9N2
;DQ226098	GGACUGAAAGAUGAUCUUAUUGAAAAUUUGCAGGCAUACCAGAAACGGAUGGGGGUGCAGAUG	0.333333	0.277778	1	Avian	H9N2
;CY045312	GGUCUGAAAGAUGAUCUUCUUGAAAAUUUACAGGCCUAUCAGAAACGAAUGGGAGUGCAGAUG	0.333333	0.314815	1	Avian	H4N6
;CY028645;GU052314;GU052330	GGUUUGAAAGAUGAUCUUCUUGAAAAUUUACAGGCCUACCAGAAACGGAUGGGAGUGCAAAUG	0.333333	0.314815	3	Avian	H3N8
;EF492257;EF492261;EF492268;EF492269;EF492270;EF492271;EF492258	GGUCUAAAAGACGAUCUUAUUAAAAAUUUGCAGGCUUACCAGAAACGAAUGGGGUUGCAGAUG	0.333333	0.314815	7	Avian	H9N2
;EF492245;EF492267	GGUCUAAAAGACGAUCUUAUUGAAAAUUUGCAGGCUUACCAAAAACGAAUGGGGUUGCAGAUG	0.333333	0.314815	2	Avian	H9N2
;EF155045;EU050069;EU050074;EU050070;EU050072;EU050075;EU050077;EF155046;EU050073	GGUCUGAAAGAUGAUCUUAUUGAAAAUUUGCAGGCUUACCAGAAACGGAUGGGAGUGCAACUG	0.333333	0.296296	9	Avian	Mixed (H9N2)
;DQ064382;DQ064392;DQ465403;EU532030;EU532029;EU532036;DQ064397;DQ064407;DQ064402;DQ997472	GGUCUGAAAGAUGAUCUUAUUGAAAAUUUGCAGGCAUACCAGAAACGGAUGGGGGUGCAGAUG	0.333333	0.296296	10	Avian	H9N2
;HM172124	GGUUUGAGAGAUAAUCUUCUUGAAAAUUUGCAGGCCUAUCAGAAACGAAUGGGAGUGCAGAUG	0.333333	0.333333	1	Avian	H5N1
;DQ064406	GGUCUGAAGGAUGAUCUUAUUGAAAAUUUGCAGGCAUACCAGAAACGGAUGGGGGUGCAGAUG	0.333333	0.296296	1	Avian	H9N2
;HM751165;HM998917	GGUCUAAAAGAUGAUCUUAUUGAAAAUUUGCAGGCUUACCAGAACCGGAUGGGAGUGCAACUG	0.333333	0.296296	2	Avian	H9N2
;GU050555	GGUCUAAAAGAUGAUCUUAUUGAAAAUUUGCAGGCUUACCAGAAACGGAAGGGGUUGCAGAUG	0.333333	0.296296	1	Avian	H9N2
;EU742889	GGUCUAAAAGAUGAUCUUCUUGAAAAUUUGCAGGCAUAUCAGAAACGGAGGGGAGUGCAAAUG	0.333333	0.296296	1	Avian	H7N2
;EF155040;EF155042;EU050051;EU050052;EU050062;EU050066;EU050057;EU050060;EU050061;EU050042;EU050067;EU050025;EU050027;HM144731;EU050063;EU050033;EU050037;EU050041;EU050043;EU050045;EU050054;EU050044;EU050047;EU050046;EU050050;EU050053;EU050059;EF155043;EF155044;EU050032;EU050035;EU050036;EU050039;EU050040;EU050048;EU050056;EU050064;EU050065;EU050049;EF155051;EU050076;EU086248;GQ373133;GQ373135;EU…	GGUCUAAAAGAUGAUCUUAUUGAAAAUUUGCAGGCUUACCAGAAACGGAUGGGAGUGCAACUG	0.333333	0.296296	50	Avian	Mixed
;EF155003	GGUCUAAAAGAUGAUCUUAUUGACGAUUUGCAGGGCUACCAGAAACGGAUGGGAGUGCAAAUG	0.333333	0.296296	1	Avian	H9N2
;GQ373122	GGUCUAAAAGAUGAUCUUAUUGAAAACUUGCAGGCUUACCAGAAACGGAUGGGAGUGCAGCUG	0.333333	0.296296	1	Avian	H9N1
;CY087174	GGUCUAAAAGAUGACCUUAUUGAAAAUUUGCAGGCUUACCAGAAGCGGAUGGGAGUGCAAUUG	0.333333	0.296296	1	Avian	H9N2
;M63538;M63530;CY005859;CY004875;CY005382;CY004562;CY014600;CY005065;CY014800;M63539;GU050867;GU051086	GGUUUGAAAGAUGACCUCCUUGAAAAUUUGCAGGCAUACCAGAAGCGGAUGGGAGUGCAGAUG	0.333333	0.296296	12	Avian	Mixed
;EF155047;EF155048;EF155050;EF155049;EF155052	GGUCUAAAAGAUGAUCUUAUUGAAAAUUUGCAGGCUUACCAGAAACGGAUGGGAGUGCAGCUG	0.333333	0.296296	5	Avian	H9N2
;CY031221	GGUCUAAGAGACGAUCUUCUUGAAAAUUUACAGGCCUAUCAGAAAAGGAUGGGAGUGCAACUG	0.333333	0.296296	1	Avian	H7N2
;GQ373132	GGUCUAAAAGAUGAUCUUAUUGAAAACUUGCAGGCUUACCAGAAACGGAUGGGAGUGCAACUG	0.333333	0.296296	1	Avian	H9N2
;AF255371;GU052136	GGUCUAAAAGAUGAUCUCAUUGAAAAUUUGCAGGCUUACCAGAAACGGAUGGGGGUGCAGAUG	0.333333	0.296296	2	Avian	H5N1
;FJ499466;FJ534541;GQ202051;GQ202039;GQ202059;GQ202045;CY063665;GQ373120;GQ373126;GQ373130;GQ373131;GQ373128;GQ373134;GU182209;GU474553;GU474561;GU474585;GU474569;GU474577;GU474593;GU474601;GU474609;EU532033;EF175671;HM751197;FJ581432;HM751173;GQ373119;GQ373129;EU882860	GGUCUAAAAGAUGACCUUAUUGAAAAUUUGCAGGCUUACCAGAAACGGAUGGGAGUGCAACUG	0.333333	0.296296	30	Avian	H9N2
;CY087182;CY087190	GGUCUAAAAGAUGACCUUAUUGAAAAUUUGCAGGCUUACCAGAAGCGGAUGGGAGUGCAACUG	0.333333	0.296296	2	Avian	H9N2
;M55479;M55480;M63521;U53169;CY022971;CY039926;GU052268;CY024926;CY014762;FJ357105;EU735787;U53168;CY022334;M63522;CY022430;CY039918;EU743152;CY027156;CY039910;GQ229279;CY084964;CY085052;CY085060;CY084972;CY085084;CY085020;CY085100;CY084980;CY085116;CY085076;CY085108;CY084988;CY084996;CY085044;CY085036;CY085068;CY085449;CY085313;CY085385;CY085417;CY085465;CY085505;CY085361;CY085369;CY085441;CY085…	GGUCUAAAAGAUGAUCUUCUUGAAAAUUUACAGGCCUAUCAGAAACGAAUGGGGGUGCAAAUG	0.333333	0.314815	63	Avian/Swine	Mixed
;EF612743;EU086247;EU086268;EU086269;EU086321;EU086227;EU086267;EU086286;EU086304;EU086305;EU086235;EU086285;EU086320	GGCCUGAAAGAUGAUCUUAUUGAAAAUUUACAGGCAUACCAGAAACGGAUGGGGGUGCAGAUG	0.333333	0.277778	13	Avian/Swine	H9N2
;CY028781;CY035071;EU743160;EU743176;CY045570	GGUCUAAAAGAUGAUCUUCUUGAAAAUUUACAGGCCUAUCAGAAACGAAUGGGAGUGCAAAUG	0.333333	0.314815	5	Avian/Swine	H1N1
;CY067593	GGUUUGAAAGACGAUCUCCUUGAAAAUUUACAGGCCUACCAGAAACGGAUGGGAGUGCAAAUG	0.333333	0.296296	1	Canine	H3N8
;CY067545;CY067553;CY067577	GGUUUGAGAGAUGAUCUCCUUGAAAAUUUACAGGCCUACCAGAAACGGAUGGGAGUGCAAAUG	0.333333	0.296296	3	Canine	H3N8
;CY032222;GQ404618;CY030752;AY855344;CY030760;FJ375236;DQ124152;DQ124160;DQ222916;DQ124197;DQ124162;DQ124188;EU534197;EU534203;CY067361;CY067369;CY067377;CY067425;CY067393;CY067401;CY067409;CY067417;CY067481;CY067489;CY067497;CY067505;CY067521;CY067529;CY067281;CY067337;CY067345;CY067385;CY067601;CY067353;CY067609;CY067537;CY067585;CY067433;CY067441;CY067449;CY067457;CY067465;CY067473	GGUUUGAAAGAUGAUCUCCUUGAAAAUUUACAGGCCUACCAGAAACGGAUGGGAGUGCAAAUG	0.333333	0.296296	43	Canine	H3N8
;CY032294;CY032398	GGUUUGAAAAAUGAUCUUCUUGAAAAUUUGCAGGCCUACCAGAAACGAAUGGGAGUGCAAAUG	0.333333	0.314815	2	Equine	H3N8
;AF001674;AF001677;AF001686;CY028837;CY040969	GGUUUGAAAAAUGAUCUUCUUGAAAAUUUGCAGGCCUACCAGAAACGGAUGGGAGUGCAAAUG	0.333333	0.314815	5	Equine	Mixed
;GQ404576;CY067513;CY067289;CY067297;CY067305;CY067313;CY067321;CY067329;CY067561;CY067569	GGUUUGAAAGAUGAUCUCCUUGAAAACUUACAGGCCUACCAGAAACGGAUGGGAGUGCAAAUG	0.333333	0.277778	10	Equine	H3N8
;AF001683;CY030150	GGUUUGAAAAAUGAUCUCCUUGAAAAUUUGCAGGCCUACCAGAAACGGAUGGGAGUGCAAAUG	0.333333	0.296296	2	Equine	H3N8
;EU794522	GGUUUGAAAGAUGAUCUCCUUGAAAAUUUGCAGGCCUACCAGAAACGGAUGGGAGUACAAAUG	0.333333	0.296296	1	Equine	H3N8
;M63533;CY005801;GU053117;U85985;CY039392	GGUCUGAAAGAUGACCUUCUCGAAAAUUUACAGGCCUAUCAAAAGCGGAUGGGAGUGCAGAUG	0.333333	0.296296	5	Equine	H7N7
;CY003697;CY006388;CY006396	GGUCUAAGAGAUGAUCUUCUUGAAAAUUUGCAGACCUAUCAAAAGCGAAUGGGAGUACAGAUG	0.333333	0.314815	3	Human	H1N2
;CY009597	GGUCUGAAAAAUGAUCUUCUUGAAAAUUUGCAGGCCUAUCAGAAACGAAUGGGAGUGCAAAUG	0.333333	0.314815	1	Human	H1N1
;EU597926	GGUCUAAGAGAUGAUCUUCUUGAAAAUUUGCAGACCUAUCAGAAACGAAUGGGGGUACAGAUG	0.333333	0.314815	1	Human	H3N2
;CY006764;M23978;AY210065	GGUCUAAAAAAUGAUCUUCUUGAAAAUUUGCAGGCCUAUCAGAAACGAAUGGGGGUGCAGAUG	0.333333	0.314815	3	Human	Mixed
;EU716541	GGUCUGAAAAAUGAUCUCCUUGAAAAUCUACAGGCCUAUCAGAAACGAAUGGGGGUGCAGAUG	0.333333	0.277778	1	Human	H1N1
;CY002665;CY006108	GGUCUAAGAGAUGAUCUUCUUGAAAAUUUGCAGACCUAUCAGAAACGAAUGGGAGUACAAAUG	0.333333	0.314815	2	Human	H1N1
;AB126629;AB126637;CY001681;EU249174;EU249173;CY003770;CY002153;CY002633;CY003673;CY003762;CY006412;CY006748;CY006868;EU249176;CY006188;CY006404;CY017116;CY002361;CY010077;CY002353;CY002657;EU249175;EU249178;CY003369;CY002993;EU249177;DQ280228;CY009437;CY009557;CY009581;CY009589;CY009853;CY009949;CY010549;CY011617;EU597986;EU597989	GGUCUAAGAGAUGAUCUUCUUGAAAAUUUGCAGACCUAUCAGAAACGAAUGGGAGUACAGAUG	0.333333	0.314815	37	Human	Mixed(H3N2/H1N2)
;X53029;CY011297;CY010869;CY010885;CY010901;CY017364;CY019964;CY020174;CY009293;CY010373;CY010877;CY021798;CY010893;CY009285;CY020166;M54941;DQ508900;CY020294;CY019740;CY021718;CY028725;CY026412;CY021910;CY020574;CY009333;CY009341;CY021054;CY009621;CY015525;CY010365;CY019756;CY012881;CY012889;DQ508876;CY021974;CY019780;CY021734;CY020566;CY019102;CY019772;EU004449;CY045853;CY010909;CY020454;CY0210…	GGUCUGAAAAAUGAUCUUCUUGAAAAUUUGCAGGCCUAUCAGAAACGAAUGGGGGUGCAGAUG	0.333333	0.314815	167	Human	H1N1
;CY044661	GGUCUGAAAAAUGAUCUCCUUGAAAAUUUACAGGCCUACCAGAAACGAAUGGGGGUGCAGAUG	0.333333	0.277778	1	Human	H1N1
;CY003265;CY009253;EU598079;EU598097;CY067222;CY068162;EU598107	GGUCUAAGAGAUGAUCUUCUUGAAAAUUUACAGACCUAUCAGAAACGAAUGGGGGUGCAGAUG	0.333333	0.314815	7	Human	H3N2
;AF258523;CY000450;CY008149;CY016668;CY017140;CY017148;CY017156;CY017380;CY021750;CY018934;CY017830;CY017020;CY016724;CY016732;CY017814;DQ299489;CY013272;CY014695;GU052015	GGUCUGAAAAAUGAUCUUCUUGAAAAUUUGCAGGCCUAUCAGAAACGAAUGGGAGUGCAGAUG	0.333333	0.314815	19	Human	H1N1
;CY002915;CY012113;CY012705	GGUCUAAGAGAUGAUCUUCUUGAAAAUUUACAGACCUAUCAGAAACGAAUGGGAGUGCAGAUG	0.333333	0.314815	3	Human	H3N2
;AF036358;AF046090;GU052128;AF046082;GU052178;AF084284;AF084283;AF255367;GU052098;AF115286;AF255365;DQ366325;AF084282;AF115287;AF255368;AF255366;AF255372;AF255374;EU049985;AJ278648	GGUCUAAAAGAUGAUCUUAUUGAAAAUUUGCAGGCUUACCAGAAACGGAUGGGGGUGCAGAUG	0.333333	0.314815	20	Human	H5N1
;M81570;M81576;M81582;M23920	GGUCUAAAAAGUGAUCUUCUUGAAAAUUUGCAGGCCUAUCAGAAACGAAUGGGGGUGCAGAUG	0.333333	0.314815	4	Human	H2N2
;EU249193;CY037312;GQ369863;GQ385840;GQ385878;GQ385881;GQ385911;GQ895005;GQ895024;CY050469;CY050501;CY050509;CY050557;CY050573;CY050597;CY050645;CY050789;CY050813;CY067946;CY067994;CY068010;CY068018;CY068058;CY068074;CY068130;CY068410;CY068586;JF316721;JF316724;CY084418;CY050621;CY050629;CY050653;CY050669;CY050677;CY050685;CY050725;CY050741;CY058789;CY080484;CY081042;CY084386;CY058797;CY084410;CY…	GGUUUAAGAGAUGAUCUUCUUGAAAAUUUGCAGACCUAUCAGAAACGAAUGGGGGUGCAGAUG	0.333333	0.333333	143	Human	H3N2
;CY032262;AY210047;AY210049;CY032238;AY210048	GGUUUAAAAGAUGAUCUUCUUGAAAAUUUGCAGGCCUAUCAGAAACGAAUGGGGGUGCAGAUG	0.333333	0.333333	5	Human	H2N2
;GQ475669;GQ475797	GGUCUGAAAGAUGAUCUCCUUGAAAAUUUACAGGCCUAUCAGAAACGAAUGGGGGUGCAGAUG	0.333333	0.296296	2	Human	H1N1
;CY002569	GGUCUUAAAAAUGAUCUCCUUGAAAAUUUGCAGGCCUAUCAGAAACGAAUGGGGGUGCAGAUG	0.333333	0.296296	1	Human	H1N1
;CY008693	GGUCUAAAAGAUGAUCUUCUUGAAAAUUUGCAGGCUUAUCAGAAGCGAAUGGGGGUGCAGAUG	0.333333	0.333333	1	Human	H3N2
;AF258522;CY001953;CY020142;CY002401;CY011185;CY002641;CY002801;CY003009;CY003025;CY003017;CY003481;CY006172;CY006356;CY003834;CY006780;CY002649;CY009861;CY010325;CY009869;CY009877;CY009965;CY009973;CY010149;CY010157;CY010165;CY010173;CY010181;CY010197;CY010205;CY010213;CY010221;CY010229;CY010237;CY010245;CY010253;CY010261;CY010277;CY010301;CY010317;CY010357;CY010421;CY010429;CY010445;CY010453;CY…	GGUCUGAAAAAUGAUCUCCUUGAAAAUUUGCAGGCCUAUCAGAAACGAAUGGGGGUGCAGAUG	0.333333	0.296296	285	Human	H1N1
;AF255373	GGUCUAAAAGAUGAUCUCAUUGAAAAUUUGCAGGCUUACCAAAAACGGAUGGGGGUGCAGAUG	0.333333	0.296296	1	Human	H5N1
;CY070147	GGUUUAAGAGAUGACCUUCUUGAAAAUUUGCAGACCUAUCAGAAACGAAUGGGGGUGCAGAUG	0.333333	0.333333	1	Human	H3N2
;EU516161	GGUCUGAAAAAUGAUCUCCUUGAAAAUUUGCAGGCCUAUCAGAAMCGAAUGGGGGUGCAGAUG	0.333333	0.296296	1	Human	H1N1
;CY007468;AB286008;EU100617;CY026628;EU249170;EU249171;CY027604;FJ912929;EU124181;CY031341;FJ912941;CY031331;AB286014;EU100612;EU100622;CY026524;EU516156;EU516158;EU716611;GQ475621;GQ475811;GQ475624;GQ475838;EU716573;EU716595;EU716609;GQ475622;EU716624;CY044350;GQ466382;GQ475898;GQ466365;CY043412;CY043468;GQ475723;GQ475751;CY043404;CY043444;CY043396;GU271969;CY031369;CY031371;CY031343;CY031355;CY…	GGUCUGAAAAAUGAUCUCCUUGAUAAUUUGCAGGCCUAUCAGAAACGAAUGGGGGUGCAGAUG	0.333333	0.296296	58	Human	H1N1
;CY050581	GGUUUAAGGGAUGAUCUUCUUGAAAAUUUGCAGACCUAUCAGAAACGAAUGGGGGUGCAGAUG	0.333333	0.333333	1	Human	H3N2
;CY077781;CY008989	GGUUUGAAAGAUGAUCUUCUUGAAAAUUUGCAGGCCUAUCAGAAACGAAUGGGGGUGCAGAUG	0.333333	0.333333	2	Human	H1N1
;CY010853	GGUCUGAAAAAUGAUCUCCUUGAAAAUUUGCAGGCCUAUCAAAAACGAAUGGGGGUGCAGAUG	0.333333	0.296296	1	Human	H1N1
;AY210058	GGUCUAAAAAAUGAUCUUCUUGAAAACUUGCAGGCCUAUCAGAAACGAAUGGGGGUGCAGAUG	0.333333	0.296296	1	Human	H2N2
;CY031389	GGUCUGAAAAAUGAUCUCCUUGAUAAUUUGCAGGCCUAUCAAAAACGAAUGGGGGUGCAGAUG	0.333333	0.296296	1	Human	H1N1
;CY009813	GGUCUAAAAAAUGAUCUCCUUGAAAAUUUGCAGGCCUAUCAGAAACGAAUGGGGGUGCAGAUG	0.333333	0.296296	1	Human	H1N1
;GQ475623	GGUCUAAAAAAUGAUCUCCUUGAUAAUUUGCAGGCCUAUCAGAAACGAAUGGGGGUGCAGAUG	0.333333	0.296296	1	Human	H1N1
;CY066296	GGUCUGAAAGAUGACCUUCUUGAAAAUUUACAGGCAUACCAGAAGCGAAUGGGAGUGCAGAUG	0.333333	0.296296	1	Human	H1N1
;AJ298947	GGUCUGAAAAAUGAUCUUUUUGAAAAUUUGCAGGCCUAUCAGAAACGAAUGGGGGUGCAGAUG	0.333333	0.333333	1	Human	?
;CY010141	GGUCUGAAAAAUGAUCUCCUUGAAAAUUUGCAGGCCUAUCAGAAACGAAUGGGGGUGCAGAUU	0.333333	0.296296	1	Human	H1N1
;GQ475998;GQ476100	GGUCUGAAAAGUGAUCUCCUUGAAAAUUUACAGGCCUAUCAGAAACGAAUGGGGGUGCAGAUG	0.333333	0.296296	2	Human	H1N1
;DQ150428;HM461805;GU135976;GU135960;GU135928;HM125977;GU135968;GU135952;GU135913;HM461789;DQ889688;EU258938	GGUCUAAAAGAUGAUCUUCUUGAAAAUUUACAGGCCUAUCAGAAGCGGAUGGGAGUGCAAAUG	0.333333	0.314815	12	Swine	Mixed
;AY377931	GGUCUAAAAGAUGACCUUCUUGUAAAUUUACAGGCCUAUCAGAAACGAAUGGGAGUGCAGAUG	0.333333	0.314815	1	Swine	H1N2
;CY085593	GGUCUAAAAGAUGAUCUUAUUGAAAAUUUGCAGGCUUACCAGAAACGAAUGGGGGUGCAGAUG	0.333333	0.314815	1	Swine	H1N2
;CY027308	GGUCUAAAAGAUGAUCUUCUUGAAAAUUUACAGGCCUAUCAGAAGCGAAUGGGAGUGCAGAUG	0.333333	0.314815	1	Swine	H1N1
;CY085377;GQ229295	GGUCUAAAGGAUGAUCUUCUUGAAAAUUUACAGGCCUAUCAGAAACGAAUGGGGGUGCAAAUG	0.333333	0.314815	2	Swine	H1N1
;AF188004;DQ280210;DQ280234;DQ280244;DQ280252;DQ280220	GGUCUAAAAGAUGAUCUUCUUGAAAAUUUACAGGCCUAUCAGAAACGAAUGGGAGUGCAGAUG	0.333333	0.314815	6	Swine	Mixed
;CY084572;CY084492;CY084524;CY084548;CY084556	GGUCUAAAAGAUGAUCUUCUUGAAAAUUUACAGGCCUAUCAAAAGCGAAUGGGGGUGCAGAUG	0.333333	0.314815	5	Swine	H1N1
;CY087139	GGUCUAAAGGAUGAUCUUCUUGAAAAUUUACAGGCCUAUCAGAAACGAAUGGGUGUGCAAAUG	0.333333	0.314815	1	Swine	H1N1
;CY041858;CY041866;CY041874;CY041882;AF342818;AY233392;GU051891;DQ335772;DQ469961;DQ469969;DQ469977;DQ469985;DQ469993;EU735819;EU826546;HM461781;CY041850;CY041906;EF551048;EF551056;HM461813;DQ470001;HM461821;EU604695;GQ484361;HQ378743;HQ378737;EU735827;FJ410143;GU480920;FJ611901;HM461797;HQ378731;HM461765;GQ457550;GQ457551;GQ457552;DQ150436;GU135944;GU135901;EU697212;DQ666942;DQ666945;HQ734188;HQ…	GGUCUAAAAGAUGAUCUUCUUGAAAAUUUACAGGCCUAUCAGAAACGGAUGGGAGUGCAAAUG	0.333333	0.314815	56	Swine	Mixed(H3N1/H1N1)
;CY020502;EU478826;EU478831;EU478833;EU478839;EU478843;EU478847;EU478848;EU478849	GGUCUGAAAGAUGACCUUCUUGAAAAUUUACAGGCCUAUCAGAAACGGAUGGGAGUGCAGAUA	0.333333	0.314815	9	Swine	H3N2
;AB434387;AB434395;CY022358;CY022955;CY024934;CY025003;CY026484;CY026492;CY027300;CY032930;CY036864;CY026476;CY022102;AB434403;CY028180;CY039992;CY044366;CY026420;CY022142;CY022286;CY022294;CY022366;CY022302;CY024955;CY024971;CY024979;CY027524;CY028428;CY027516;CY024963;CY022110;CY022126;CY026140;CY022118;CY025206;CY028436;CY022134;CY084484;CY084780;CY084820;CY084852;CY084860;CY084828;CY084844;CY…	GGUCUAAAAGAUGAUCUUCUUGAAAAUUUACAGGCCUAUCAGAAGCGAAUGGGGGUGCAGAUG	0.333333	0.314815	91	Swine	H1N1
;DQ280196;DQ280204	GGUCUAAAAGACGAUCUUCUUGAAAAUUUACAGGCCUAUCAGAAACGAAUGGGGGUGCAGAUG	0.333333	0.314815	2	Swine	H1N1
;CY022326;CY022318;CY027508	GGUCUAAAAGAUGAUCUUCUUGAAAAUUUACAGGCCUAUCAGAAACGGAUGGGAGUGCAGAUG	0.333333	0.314815	3	Swine	H1N1
;CY085004	GGUCUAAAAGAUGAUCUUCUUGAAAAUUUACAGGCCUAUCAGAAACGACUGGGGGUGCAAAUG	0.333333	0.314815	1	Swine	H1N1
;CY006684;AY790298;CY085092;CY022470;CY025011;CY022963;CY028172;M63520;CY022382;CY022979;CY026436;CY026444;CY022422;CY022390;CY026452;AF188003;CY022406;CY024987;CY030736;CY022446;CY022454;CY022995;CY024995;CY022462;GQ404622;CY061744;CY028789	GGUCUAAAAGAUGAUCUUCUUGAAAAUUUACAGGCCUAUCAGAAACGAAUGGGGGUGCAGAUG	0.333333	0.314815	27	Swine	H1N1
;FJ461595	GGUCUCAAAGAUGAUCUUCUUGAAAAUUUACAGGCCUAUCAGAAACGGAUGGGAGUGCAAAUG	0.333333	0.314815	1	Swine	H5N2
;AF251406;AF251414;AF251430	GGUCUAAAAGAUGAUCUUCUUGAAAAUUUACAGACCUAUCAGAAACGGAUGGGAGUGCAAAUG	0.333333	0.314815	3	Swine	H3N2
;CY022030;CY022038;CY022070;CY026460	GGUCUAAAAGAUGAUCUUCUUGAAAAUUUACAGGCCUAUCAGAAGCGAAUGGGGGUGCAAAUG	0.333333	0.314815	4	Swine	H1N1
;M55477	GGUUUAAAAGAUGAUCUUCUUGAAAAUUUGCAGGCCUAUCAGAAGCGAAUGGGGGUGCAGAUG	0.333333	0.333333	1	Swine	H3N2
;HM998925	GGUCUAAAGGAUGACCUUAUUGAAAAUUUGCAGGCUUACCAGAAACGGAUGGGAGUGCAACUG	0.333333	0.296296	1	Swine	H9N2
;EU850622;EU850625;CY085609;CY085665	GGUUUAAAAGAUGAUCUUCUUGAAAAUUUGCAGGCCUAUCAGAAACGGAUGGGAGUGCAAAUA	0.333333	0.333333	4	Swine	H1N2
;CY022350;CY022374	GGUCUAAAAGAUGAUCUCCUUGAAAAUUUACAGGCCUAUCAGAAGCGAAUGGGGGUGCAGAUG	0.333333	0.296296	2	Swine	H1N1
;GU086028	GGUCUAAAAGAUGAUCAUCUUGAAAAUCUACAGGCCUAUCAGAAACGAAUGGGAGUGCAAAUG	0.333333	0.296296	1	Swine	H1N1
;EU478807	GGUCUGAAAGAUGACCUUCUUGAAAAUUUACAGGCAUACCAGAAGCGGAUGGGAGUGCAAAUA	0.333333	0.296296	1	Swine	H3N2
;CY085633	GGUCUAAAAGAUGAUCUCCUUGAAAAUUUACAGGCCUAUCAGAAACGAAUGGGACUGCAAAUG	0.333333	0.296296	1	Swine	H1N2
;GU135921	GGUCUAAAGGAUGAUCUUCUUGAAAACUUACAGGCCUAUCAGAAACGAAUGGGAGUGCAAAUG	0.333333	0.296296	1	Swine	H3N2
;CY024943	GGUUUAAAAGAUGAUCUUCUUGAAAAUUUGCAGGCCUAUCAAAAACGAAUGGGGGUGCAGAUG	0.333333	0.333333	1	Swine	H1N1
;EF455563;FJ789835;GQ422388;HM223595;GU086012;HM215168;GU646033;HM145746;HM215160;HM210861;HM210853;EU502886;FJ789829;GU086044;HM215152;GU086036;GU086020	GGUCUAAAAGAUGAUCUUCUUGAAAAUCUACAGGCCUAUCAGAAACGAAUGGGAGUGCAAAUG	0.333333	0.296296	17	Swine	H1N1
;GQ229319;CY085681;CY085617	GGUCUAAAAGAUGAUCUCCUUGAAAAUUUACAGGCCUAUCAGAAACGAAUGGGGGUGCAAAUG	0.333333	0.296296	3	Swine	H1N2
;HM223587	GGUCUAAAAGAUGAUCUUCUUGAAAAUCUACAGGCCUAUCAGAAACGAAUGGGAGUGCAAGUG	0.333333	0.296296	1	Swine	H1N1
;U49115;CY087043;CY087051;CY087059;CY087067;CY087075;CY087083;CY087091;CY087107;CY087115;CY087123;CY087099	GGUCUAAAAGAUGAUCUUCUUGAAAAUCUACAGGCCUAUCAGAAACGAAUGGGGGUGCAAAUG	0.333333	0.296296	12	Swine	H1N1
;M63518;M63535	GGUUUGAAAGAUGAUCUUCUUGAAAAUUUGCAGGCCUAUCAGAAGCGAAUGGGGGUGCAGAUG	0.333333	0.333333	2	Swine	H1N1
;GU135936	GGUCUAAAGGAUGAUCUUCUUGAAAACUUACAGGCCUUUCAGAAACGAAUGGGAGUGCAAAUG	0.333333	0.296296	1	Swine	H1N1
;GU086052	GGUCUAAAGGAUGAUCUUCUUGAAAAUCUACAGGCCUAUCAGAAACGAAUGGGAGUGCAAAUG	0.333333	0.296296	1	Swine	H1N1
;CY085625	GGUUUAAAAGAUGAUCUUCUUGAAAAUUUGCAGGCCUAUCAGAAACGGAUGGGAGUGCAAAUG	0.333333	0.333333	1	Swine	H1N2
;EU794538;FJ200421;FJ200429	CGUUUGAAAGAUGAUCUCCUUGAAAAUUUGCAGGUCUACCAGAAACGGAUGGGAGUGCAAAUG	0.277778	0.246914	3	Swine/Equine	H3N8
;AF156461	GGUUUGAAAGAUGAUCUUAUUGAAAAUUUGCAGGCAUACCAGAAACGGAUGGGGGUGCAGAUG	0.277778	0.246914	1	Avian	H9N2
;CY038405	GGUCUAAAAGAUGAUCUUAUUGAAAAUUUGCAGGCUUACCAGAAGCGGAUGGGAUUACAGAUG	0.277778	0.246914	1	Avian	H9N2
;AB586830;AB586838	GGUCUAAAAGAUGAUCUUAUUGAAAAUUUGCAGGUUUACCAGAAACGGAUGGGAAUGCAAAUG	0.277778	0.262346	2	Avian	H6N1
;EU049998	GGUUUAAAAGAUGAUCUUAUUGAAAAUUUGCAGGCUUACCAGAAACGGAUGGGAGUGCAAAUG	0.277778	0.262346	1	Avian	H6N1
;CY038421;CY038445	GGUCUAAAAGAUGAUCUUAUUGAAAAUUUGCAGGCUUAUCAGAAACGGAUGGGAUUGCAGAUG	0.277778	0.262346	2	Avian	H9N2
;EF154991	AGAUUGAAAGAUGAUCUUAUUGAAAAUUUGCAGGCCUACCAGAAACGGAUGGGAGUGCAAAUG	0.277778	0.231481	1	Avian	H9N2
;CY038413	GGUUUAAAAGAUGAUCUUAUUGAAAAUUUGCAGGCUUACCAGAAACGGAUGGGGUUGCAGAUG	0.277778	0.262346	1	Avian	H9N2
;EU532034	GGUCUGAAAGAUGAUCUUAUUGAAAAUUUGCAGGCAUACCAGAAACGGAUGGGGGUACAGAUG	0.277778	0.231481	1	Avian	H9N2
;CY025270	GGUCUGAGAAAUGAUCUCCUUGAAAAUUUACAGGCCUAUCAGAAACGAAUGGGAGUGCAGAUG	0.277778	0.231481	1	Human	H1N1
;CY040259	GGUCUGAAAAAUGAUCUCCUUGAAAAUUUACAGGCCUAUCAGAAACGGAUGGGGGUGCAAAUG	0.277778	0.231481	1	Human	H1N1
;CY037336;CY043388	GGUCUAAAAAAUGAUCUCCUUGAAAAUUUACAGGCCUAUCAGAAACGAAUGGGGGUGCAGAUG	0.277778	0.231481	2	Human	H1N1
;GQ475721	GGUCUGAAAAAUGAUCUCCUUGAAAAUUUACAGGCCUAUCAGAACCGAAUGGGGGUGCAGAUG	0.277778	0.231481	1	Human	H1N1
;GQ475967	GGUCUGAAAAAUGAUCUCCUUGAAAAUUUACAGGCCUAUCAGAAACGAUUGGGGGUGCAGAUG	0.277778	0.231481	1	Human	H1N1
;CY013558;CY013566;CY013590;EU100619;CY013598;CY014008;CY022582;EU100616;CY016684;CY016692;EU249167;CY015581;FJ445091;CY017372;CY025596;CY025222;CY026532;CY027140;CY027212;CY027244;CY028140;CY028404;HQ166047;CY025588;CY026220;CY027228;CY028460;CY025668;CY025940;CY026228;CY026980;CY027372;CY028148;CY027676;CY027468;CY027356;CY041451;CY025286;CY026356;CY027844;CY028773;CY025374;CY025494;CY025438;CY…	GGUCUGAAAAAUGAUCUCCUUGAAAAUUUACAGGCCUAUCAGAAACGAAUGGGGGUGCAGAUG	0.277778	0.231481	683	Human	H1N1
;CY013574;CY020158;CY021758;CY016676	GGUCUGAAAAACGAUCUCCUUGAAAAUUUACAGGCCUAUCAGAAACGAAUGGGGGUGCAGAUG	0.277778	0.231481	4	Human	H1N1
;EU716613;GQ475689;GQ475952	GGUCUGAAAAAUGAUCUCCUUGAAAAUUUACAGGCCUAUCAGAAACGGAUGGGGGUGCAGAUG	0.277778	0.231481	3	Human	H1N1
;CY027412;CY027916;CY025294;CY025564;CY026348;CY026636;CY027180;CY027556;CY025398	GGUCUGAAAAAUGAUCUCCUUGAAAAUUUACAGGCCUAUCAAAAACGAAUGGGAGUGCAGAUG	0.277778	0.231481	9	Human	H1N1
;CY020270;EU100614;CY025238;CY025676;CY025980;CY026236;CY026684;CY026692;CY026868;CY026876;CY027012;CY027052;CY027348;CY027428;CY027460;CY027652;CY027668;CY027740;CY027788;CY027908;CY027980;CY028020;CY028060;CY028108;CY028132;CY028292;CY028348;CY028452;CY028749;CY030070;CY031552;CY025948;CY027364;CY027812;CY025326;CY025518;CY025964;CY026988;CY027036;CY028044;CY025430;CY025526;CY025684;CY026596;CY…	GGUCUGAAAAAUGAUCUCCUUGAAAAUUUACAGGCCUAUCAGAAACGAAUGGGAGUGCAGAUG	0.277778	0.231481	188	Human	H1N1
;GQ475618	GGUCUGAAAAAUGAUCUCCUUGAAAAUUUACAGGCCUAUCARAAACGAAUGGGGGUGCAGAUG	0.277778	0.231481	1	Human	H1N1
;CY028076;CY028396;CY050773	GGUCUGAAAAAUGAUCUUCUUGAAAAUUUACAGGCCUAUCAGAAACGAAUGGGGGUGCAGAUG	0.277778	0.246914	3	Human	H1N1
;EU716552	GGUCUGAAAAAUGAUCUCCUUGAAAAUUUACAGGUCUAUCAGAAACGAAUGGGGGUGCAGAUG	0.222222	0.185185	1	Human	H1N1
;CY026652	GGUUUGAAAAAUGAUCUCCUUGAAAAUUUACAGGCCUAUCAGAAACGAAUGGGAGUGCAGAUG	0.222222	0.185185	1	Human	H1N1
;CY031572	GGUCUGAAAAAUGAUCUCCUUGAAAAUUUACAGGCCUAUCAGAAACGAAUGGGAGUACAGAUG	0.222222	0.17284	1	Human	H1N1
;AY377926	GGUCUAAAAGAUGACCUUCUUGAAAAUUUACAGGCCUAUCAGAAACGAAUUGGAGUGCAGAUG	0.277778	0.246914	1	Swine	H3N1
;CY084596;CY084620;CY084644;CY084604;CY084628;CY084676;CY084668	GGUCUAAAAGAUGAUCUUCUUGAAAAUUUACAGGCCUAUCAGAAGCGAAUGGGGGUUCAGAUG	0.277778	0.246914	7	Swine	H1N1
;EU015989;FJ374518;GQ229367;GQ229343;CY061840;CY061848;CY061856	GGUUUAAAAGAUGAUCUUCUUGAAAAUUUACAGGCCUAUCAGAAACGGAUGGGAGUGCAAAUG	0.277778	0.262346	7	Swine	H1N2
;GQ229375;GU086084;CY086001	GGUUUAAAAGAUGAUCUUCUUGAAAAUUUACAGGCCUAUCAGAAACGAAUGGGAGUGCAAAUG	0.277778	0.262346	3	Swine	H1N2
;CY085737;CY061656	GGUUUAAAAGAUGACCUUCUUGAAAAUUUACAGGCCUAUCAGAAACGGAUGGGAGUGCAAAUG	0.277778	0.262346	2	Swine	H1N2
;GQ229335	GGUUUAAAAGAUGAUCUUCUUGAAAAUUUACAGGCCUAUCAGAAACGGAUGGGAGUACAAAUG	0.222222	0.197531	1	Swine	H1N2
