# Supplementary material for: The 3′ Splice Site of Influenza A Segment 7 mRNA Can Exist in Two Conformations: A Pseudoknot and a Hairpin
Source: PLoS One. 2012 Jun 7;7(6):e38323. doi: 10.1371/journal.pone.0038323 (PMC3369869; doi:10.1371/journal.pone.0038323)
Supplement: Table S4 — Counts for putative base triples. The most frequent triple is in red and the second most frequent in orange. (XLSX) [file pone.0038323.s007.xlsx]

## Sheet: Sheet1
triple	704710740	705709741	706708742		685714736	686713737	687712738
AUA	717	297	665		0	0	0
UAU	0	0	0		0	727	0
CGG	0	0	0		628	0	0
AUG	0	400	7		0	0	0
GCG	0	0	0		0	0	381
ACG	0	2	0		0	0	328
UGG	0	0	0		75	0	0
ACA	2	13	31		0	0	10
AUC	1	1	20		0	0	0
CGU	0	0	0		18	0	0
GUA	7	1	2		0	0	0
UUG	0	9	0		0	0	0
GCA	0	0	0		0	0	8
UUA	3	4	1		0	0	0
CUA	3	3	0		0	0	0
AUU	0	1	3		0	0	0
CGA	0	0	0		4	0	0
UCG	0	0	0		0	0	4
AAA	0	0	3		0	0	0
AGG	0	1	0		2	0	0
GGG	0	0	0		3	0	0
AAU	0	0	0		0	2	0
ACC	0	0	2		0	0	0
CAU	0	0	0		0	2	0
CUG	0	2	0		0	0	0
UAC	0	0	0		0	2	0
AGA	1	0	0		0	0	0
ACU	0	0	0		0	0	1
GCC	0	0	0		0	0	1
CAG	0	0	0		1	0	0
CGC	0	0	0		1	0	0
CCG	0	0	0		0	0	1
UAG	0	0	0		0	1	0
UGU	0	0	0		1	0	0
